# Supplementary material for: Identification and comprehensive analyses of the CBL and CIPK gene families in wheat (Triticum aestivum L.)
Source: PubMed Central journal article supplement (PMC4634908; doi:10.1186/s12870-015-0657-4), 2015-11-04
Supplement: 12870_2015_657_MOESM1_ESM.pdf [file 12870_2015_657_MOESM1_ESM.pdf]

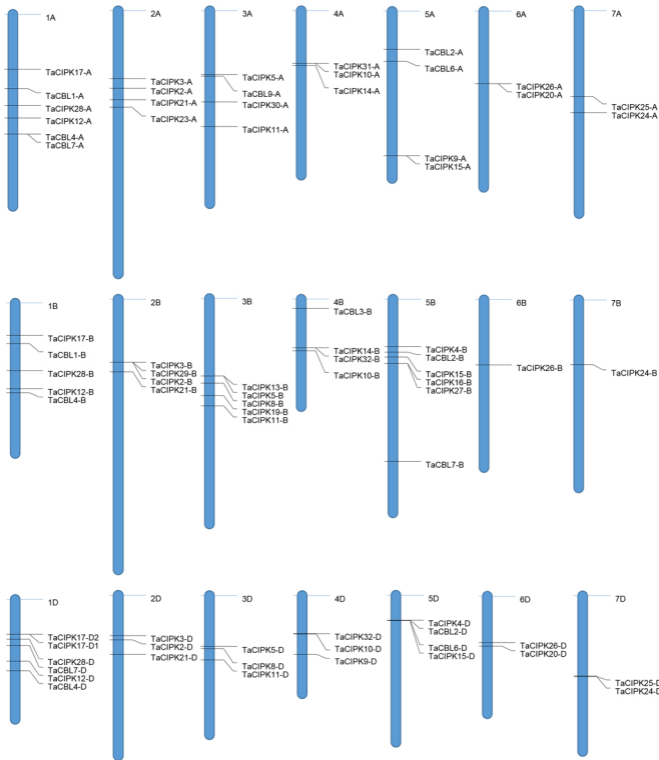

**Additional file 1:** Chromosomal distribution of *TaCBL* and *TaCIPK* genes identified in this study. The chromosome number is indicated on the top of each chromosome.
