# Supplementary material for: Identification and comprehensive analyses of the CBL and CIPK gene families in wheat (Triticum aestivum L.)
Source: PubMed Central journal article supplement (PMC4634908; doi:10.1186/s12870-015-0657-4), 2015-11-04
Supplement: 12870_2015_657_MOESM5_ESM.pdf [file 12870_2015_657_MOESM5_ESM.pdf]

|                       | (1) | 1          | 10         | 20          | 30          | 46        |
|-----------------------|-----|------------|------------|-------------|-------------|-----------|
| AtCAM1 NP_001154755   | (1) | -----      | -----      | -----       | -----       | -----     |
| OsCaM LOC_Os05g41210  | (1) | -----      | -----      | -----       | -----       | -----     |
| AtCAM2 NP_001189724   | (1) | -----      | -----      | -----       | -----       | -----     |
| OsCaM3 LOC_Os01g17190 | (1) | -----      | -----      | -----       | -----       | -----     |
| CeCaM NP_503386       | (1) | -----      | -----      | -----       | -----       | -----     |
| DrCaM BC164893        | (1) | -----      | -----      | -----       | -----       | -----     |
| HsCML3 NP_005176      | (1) | -----      | -----      | -----       | -----       | -----     |
| ScCaM NP_009667       | (1) | -----      | -----      | -----       | -----       | -----     |
| MmCam4 NP_064420      | (1) | -----      | -----      | -----       | -----       | -----     |
| AtCBL4 AF192886       | (1) | -----      | -----      | -----       | -----       | -----     |
| OsCBL4 ABA54179       | (1) | -----      | -----      | -----       | -----       | -----     |
| TaCBL4                | (1) | -----      | -----      | -----       | -----       | -----     |
| OsCBL7 ABA54182       | (1) | -----      | -----      | -----       | -----       | -----     |
| TaCBL7                | (1) | -----      | -----      | -----       | -----       | -----     |
| OsCBL9 ABA54184       | (1) | MESGYGFRFS | DDDDVESAS  | SLTVGERLCA  | AFLPFVAIAE  | AVFFALTD  |
| TaCBL9                | (1) | MASRFNSRIS | SGDLRSGSSL | TVGERLCAVVL | PFVAIAEFVFF | ALTD      |
| AtCBL1 AAC26008       | (1) | -----      | -----      | -----       | -----       | -----     |
| AtCBL9 AF411958_1     | (1) | -----      | -----      | -----       | -----       | -----     |
| OsCBL1 ABA54176       | (1) | -----      | -----      | -----       | -----       | -----     |
| TaCBL1                | (1) | -----      | -----      | -----       | -----       | -----     |
| AtCBL7 AF290434_1     | (1) | -----      | -----      | -----       | -----       | -----     |
| AtCBL6 AF192884_1     | (1) | -----      | -----      | -----       | -----       | -----MMMQ |
| AtCBL2 AAC26009       | (1) | -----      | -----      | -----       | -----       | -----MSQ  |
| AtCBL3 AAC26010       | (1) | -----      | -----      | -----       | -----       | -----MSQ  |
| OsCBL2 ABA54177       | (1) | -----      | -----      | -----       | -----       | -----MVQ  |
| OsCBL3 ABA99199       | (1) | -----      | -----      | -----       | -----       | -----MVQ  |
| TaCBL2                | (1) | -----      | -----      | -----       | -----       | -----MVQ  |
| TaCBL3                | (1) | -----      | -----      | -----       | -----       | -----MLQ  |
| OsCBL6 ABA54181       | (1) | -----      | -----      | -----       | -----       | -----MVD  |
| TaCBL6                | (1) | -----      | -----      | -----       | -----       | -----MVD  |
| Consensus             | (1) | -----      | -----      | -----       | -----       | -----     |

|                       | (47) | 47        | 60          | 70     | 80           | 92                |
|-----------------------|------|-----------|-------------|--------|--------------|-------------------|
| AtCAM1 NP_001154755   | (1)  | -----     | -----       | -----  | -----        | -----             |
| OsCaM LOC_Os05g41210  | (1)  | -----     | -----       | -----  | -----        | -----             |
| AtCAM2 NP_001189724   | (1)  | -----     | -----       | -----  | -----        | -----             |
| OsCaM3 LOC_Os01g17190 | (1)  | -----     | -----       | -----  | -----        | -----             |
| CeCaM NP_503386       | (1)  | -----     | -----       | -----  | -----        | -----             |
| DrCaM BC164893        | (1)  | -----     | -----       | -----  | -----        | -----             |
| HsCML3 NP_005176      | (1)  | -----     | -----       | -----  | -----        | -----             |
| ScCaM NP_009667       | (1)  | -----     | -----       | -----  | -----        | -----             |
| MmCam4 NP_064420      | (1)  | -----     | -----       | -----  | -----        | -----             |
| AtCBL4 AF192886       | (1)  | -----M    | GCSVSK----- | -----K | KKKNAMR-PP   | G-----            |
| OsCBL4 ABA54179       | (1)  | -----M    | GCASS-----  | -----K | QFKR-PP      | G-----            |
| TaCBL4                | (1)  | -----M    | GCVLSS----- | -----P | -----RRSR-TP | G-----            |
| OsCBL7 ABA54182       | (1)  | -----M    | GCISS-----  | -----K | QFKR-AAE     | -----             |
| TaCBL7                | (1)  | -----M    | GCVSS-----  | -----K | QFRR-APP     | -----             |
| OsCBL9 ABA54184       | (47) | CLADLLPPS | AAAS---R    | HRRSAA | SSYLA        | AVAR--KWNHQQRGRVG |
| TaCBL9                | (47) | CLAGICSPP | SASSSSHP    | RRDPS  | APSFFLT      | AKKCSHHHHHLLRRRVA |
| AtCBL1 AAC26008       | (1)  | -----M    | GCFHSK----- | -----A | AKEF----     | RC-----           |
| AtCBL9 AF411958_1     | (1)  | -----M    | GCFHST----- | -----A | AAREF----    | PD-----           |
| OsCBL1 ABA54176       | (1)  | -----M    | GCFQST----- | -----A | RRP--R--     | PG-----           |
| TaCBL1                | (1)  | -----M    | GCIQST----- | -----P | KRRQHP--     | AG-----           |
| AtCBL7 AF290434_1     | (1)  | -MDSTRNS  | SASNST---   | -----G | CFTDQK-      | -----             |
| AtCBL6 AF192884_1     | (5)  | CLDGLKH   | LALILLT---  | -----C | CDADPP--     | KV-----           |
| AtCBL2 AAC26009       | (4)  | CVDGIKHL  | CTSVLG---   | -----C | FDLDLYKQ     | SGG-----          |
| AtCBL3 AAC26010       | (4)  | CIDGFKH   | VCSFFR---   | -----C | FDIDIYKQ     | SGG-----          |
| OsCBL2 ABA54177       | (4)  | CLDGVRQ   | LAVVFK---   | -----C | CDLELK-Q     | PRG-----          |
| OsCBL3 ABA99199       | (4)  | CLDGVRQ   | LAVVFK---   | -----C | CDLELK-Q     | PRG-----          |
| TaCBL2                | (4)  | CLDGVKH   | LAVLFK---   | -----C | CDLELK-Q     | PRG-----          |
| TaCBL3                | (4)  | CLEGVRH   | LGGVLLK---  | -----C | CDIDLK-Q     | PKG-----          |
| OsCBL6 ABA54181       | (4)  | SSEGLRR   | LAAALLFK--- | -----C | CSLDS        | SNRPNG-----       |
| TaCBL6                | (4)  | FPEGLRR   | LAAALLFK--- | -----C | CDLDI        | PNRPKG-----       |
| Consensus             | (47) |           | M           |        |              | G                 |

|                       | (93) | 93    | 100         | 110                   | 120           | 138    |
|-----------------------|------|-------|-------------|-----------------------|---------------|--------|
| AtCAM1 NP_001154755   | (1)  | ----- | MADQLTDEQ   | ISEFKEAFS             | LFDKDGDVFF    | LSDLG  |
| OsCaM LOC_Os05g41210  | (1)  | ----- | MADQLTDEQ   | IAEFKEAFS             | LFDKDG        | -----  |
| AtCAM2 NP_001189724   | (1)  | ----- | MADQLTDDQ   | ISEFKEAFS             | LFDKDGDG      | -----  |
| OsCaM3 LOC_Os01g17190 | (1)  | ----- | MADQLTDDQ   | IAEFKEAFS             | LFDKDG        | -----  |
| CeCaM NP_503386       | (1)  | ----- | MADQLTEEQ   | IAEFKEAFS             | LFDKDG        | -----  |
| DrCaM BC164893        | (1)  | ----- | MADQLTEEQ   | IAEFKEAFS             | LFDKDG        | -----  |
| HsCML3 NP_005176      | (1)  | ----- | MADQLTEEQ   | VTEFKEAFS             | LFDKDG        | -----  |
| ScCaM NP_009667       | (1)  | ----- | MSSNLTEEQ   | IAEFKEAF              | ALFDKDN       | -----  |
| MmCam4 NP_064420      | (1)  | ----- | MSHGF       | TKEEVAE               | FQAAFNR       | FDKKN  |
| AtCBL4 AF192886       | (19) | ----- | YEDPELLASV  | TPFTVEEVEALY          | ELFKKLS       | SII    |
| OsCBL4 ABA54179       | (15) | ----- | YEEPAVLLAQ  | TTFTVNEVEALRELY       | NKMSY         | SII    |
| TaCBL4                | (17) | ----- | YEEPTVLA    | SQTSFTVNEVEALY        | ELFKKLS       | SIF    |
| OsCBL7 ABA54182       | (15) | ----- | HEDPAIILAKE | TTFSVSEVEALY          | ELFKKISH      | SIF    |
| TaCBL7                | (15) | ----- | HEDAALLAKE  | TTFSLNEVEALY          | ELFKKIS       | SIF    |
| OsCBL9 ABA54184       | (87) | IGCTS | LTLRQLARL   | LADESRC               | FSVNEVEALFELY | EKTS   |
| TaCBL9                | (93) | PGCSS | LSFRDLARL   | LADESRC               | FSVNEVEALFELY | KKIS   |
| AtCBL1 AAC26008       | (15) | ----- | HEDPVKLA    | SETAFSVSEVEALFELFKS   | ISS           | SVV    |
| AtCBL9 AF411958_1     | (15) | ----- | HENPVKLA    | SETAFSVSEVEALYELFKS   | ISS           | SVV    |
| OsCBL1 ABA54176       | (15) | ----- | YEDPVGLA    | SETAFSVSEVEALFELFKS   | IS            | SVI    |
| TaCBL1                | (17) | ----- | YEDPVHLLA   | SQTAFSVSEVEALFELFKS   | IS            | SVI    |
| AtCBL7 AF290434_1     | (21) | ----- | KRK---      | ALYEVFKKLS            | GVDCQRNEGNV   | VEGVTC |
| AtCBL6 AF192884_1     | (28) | ----- | RQNP        | KDVARGTVFTVNE         | TEALYELFKS    | IS     |
| AtCBL2 AAC26009       | (30) | ----- | LGDPELLA    | RDTVFSVSETEALYELFKKIS | SAVI          | -----  |
| AtCBL3 AAC26010       | (30) | ----- | LGDPELLA    | RDTVFSVSETEALYELFKKIS | SAVI          | -----  |
| OsCBL2 ABA54177       | (29) | ----- | LEDQPVLARE  | TVFSVSEVEALYELFKKIS   | SAVI          | -----  |
| OsCBL3 ABA99199       | (29) | ----- | LEDQPVLARE  | TVFSVSEVEALYELFKKIS   | SAVI          | -----  |
| TaCBL2                | (29) | ----- | LEDQPVLARE  | TVFSVSEVEALYELFKKIS   | SAVI          | -----  |
| TaCBL3                | (29) | ----- | LEDPEVLARE  | TVFSVSEVEALYELFKKIS   | SAVI          | -----  |
| OsCBL6 ABA54181       | (30) | ----- | LQDPERLARE  | TVFNVNE               | TEALYELFKKIS  | SAVV   |
| TaCBL6                | (30) | ----- | LEDPERLARE  | TVFSVNE               | TEALYELFKKIS  | SAVV   |
| Consensus             | (93) |       | EDPMLA      | TFSVSEVEALFELFKKIS    | SVI           |        |

EF hand 1

|                       | (139) | 139        | 150      | 160       | 170                   | 184                   |
|-----------------------|-------|------------|----------|-----------|-----------------------|-----------------------|
| AtCAM1 NP_001154755   | (34)  | FDFKRLSNCL | ETTPELSH | GCITTKEL  | LGTVMRSLGQNPTEAELQDMI |                       |
| OsCaM LOC_Os05g41210  | (25)  | -----      | -----    | DGCITTKEL | LGTVMRSLGQNPTEAELQDMI |                       |
| AtCAM2 NP_001189724   | (27)  | -----      | MLHPPFP  | SIIVG     | GCITTKEL              | LGTVMRSLGQNPTEAELQDMI |
| OsCaM3 LOC_Os01g17190 | (25)  | -----      | -----    | -----     | DGCITTKEL             | LGTVMRSLGQNPTEAELQDMI |
| CeCaM NP_503386       | (25)  | -----      | -----    | -----     | DGTITTKEL             | LGTVMRSLGQNPTEAELQDMI |
| DrCaM BC164893        | (25)  | -----      | -----    | -----     | DGTITTKEL             | LGTVMRSLGQNPTEAELQDMI |
| HsCML3 NP_005176      | (25)  | -----      | -----    | -----     | DGCITTKREL            | LGTVMRSLGQNPTEAELRDMM |
| ScCaM NP_009667       | (25)  | -----      | -----    | -----     | NGSISSE               | LATVMRSLGLSPSEAEVNDLM |
| MmCam4 NP_064420      | (25)  | -----      | -----    | -----     | DGHSVVEE              | LGDMKQLGK             |
| AtCBL4 AF192886       | (52)  | -----      | -----    | -----     | DDGLIHKEEFQALALFR     | NRN                   |
| OsCBL4 ABA54179       | (48)  | -----      | -----    | -----     | KDGLIHKEEFQALALFR     | NSRK                  |
| TaCBL4                | (50)  | -----      | -----    | -----     | KDGLIHKEEFRLALFR      | TSK                   |
| OsCBL7 ABA54182       | (48)  | -----      | -----    | -----     | KDGLIHKEEFQALALFR     | NSNK                  |
| TaCBL7                | (48)  | -----      | -----    | -----     | KDGLIHKEEFQALALFR     | NSNR                  |
| OsCBL9 ABA54184       | (128) | -----      | -----    | -----     | DDGLTHKEEPQALALFR     | TPSG                  |
| TaCBL9                | (134) | -----      | -----    | -----     | NDGLIHKEELQALALFK     | TPSG                  |
| AtCBL1 AAC26008       | (48)  | -----      | -----    | -----     | DDGLINKEEFQALALFK     | SRKR                  |
| AtCBL9 AF411958_1     | (48)  | -----      | -----    | -----     | DDGLINKEEFQALALFK     | NRKK                  |
| OsCBL1 ABA54176       | (48)  | -----      | -----    | -----     | DDGLINKEEFRLALFK      | NRKK                  |
| TaCBL1                | (50)  | -----      | -----    | -----     | DDGLINKEEFQALALFK     | NTRK                  |
| AtCBL7 AF290434_1     | (51)  | -----      | -----    | -----     | YYGEMNKQFHVAIF        | QTDKN                 |
| AtCBL6 AF192884_1     | (57)  | -----      | -----    | -----     | KNGLIDKEQFQLVLF       | KMNT                  |
| AtCBL2 AAC26009       | (63)  | -----      | -----    | -----     | DDGLINKEEFQALALFK     | TNKK                  |
| AtCBL3 AAC26010       | (63)  | -----      | -----    | -----     | DDGLINKEEFQALALFK     | TNKK                  |
| OsCBL2 ABA54177       | (62)  | -----      | -----    | -----     | DDGLINKEEFQALALFK     | TSKK                  |
| OsCBL3 ABA99199       | (62)  | -----      | -----    | -----     | DDGLINKEEFQALALFK     | TSKK                  |
| TaCBL2                | (62)  | -----      | -----    | -----     | DDGLINKEEFQALALFK     | TSKK                  |
| TaCBL3                | (62)  | -----      | -----    | -----     | DDGLINKEEFQALALFK     | TSKK                  |
| OsCBL6 ABA54181       | (63)  | -----      | -----    | -----     | DDGLINKEEFQALALFK     | TNRK                  |
| TaCBL6                | (63)  | -----      | -----    | -----     | DDGVINKEEFQALALFK     | TNRK                  |
| Consensus             | (139) |            |          | DGLI      | KEEFQALALFK           | KK                    |

EF hand 1

EF hand 2

|                       | (185) | 185   | 190                                          | 200 | 210 | 220 | 230 |
|-----------------------|-------|-------|----------------------------------------------|-----|-----|-----|-----|
| AtCAM1 NP_001154755   | (80)  | NEV   | DADGNGTIDFPEFLNLMAKMKMDTDSSEELKEAFRVFDKDQNG  |     |     |     |     |
| OsCaM LOC_Os05g41210  | (54)  | NEV   | DADGNGTIDFPEFLNLMAKMKMDTDSSEELKEAFRVFDKDQNG  |     |     |     |     |
| AtCAM2 NP_001189724   | (66)  | NEV   | DADGNGTIDFPEFLNLMAKMKMDTDSSEELKEAFRVFDKDQNG  |     |     |     |     |
| OsCaM3 LOC_Os01g17190 | (54)  | NEV   | DADGNGTIDFPEFLNLMAKMKMDTDSSEELKEAFRVFDKDQNG  |     |     |     |     |
| CeCaM NP_503386       | (54)  | NEV   | DADGNGTIDFPEFLTMARKMKDTDSSEELIREAFRVFDKDGNG  |     |     |     |     |
| DrCaM BC164893        | (54)  | NEV   | DADGNGTIDFPEFLTMARKMKDTDSSEELIREAFRVFDKDGNG  |     |     |     |     |
| HsCML3 NP_005176      | (54)  | SEI   | DRDNGTIDFPEFLGMARKMKDTDSSEELIREAFRVFDKDGNG   |     |     |     |     |
| ScCaM NP_009667       | (54)  | NEI   | DVDGNHQIEFSEFLALMSRQLKSNDSSEQLLEAFKVFDDKNGDG |     |     |     |     |
| MmCam4 NP_064420      | (54)  | SKL   | TDGDGKISFEFLTAIEKYKKGHRAG-ELRAVFNVLDDQNGDG   |     |     |     |     |
| AtCBL4 AF192886       | (81)  | DMFD  | VKRNGVIEFGEFVRSLSGVFHPSPAPVHEKVKFAFKLYDLRQTG |     |     |     |     |
| OsCBL4 ABA54179       | (77)  | DLFD  | LKRNGVIEFGEFVRSLSVFHPKAPKSEKTAFAFKLYDLRGTG   |     |     |     |     |
| TaCBL4                | (79)  | DLFD  | LKRNGVIEFGEFVRSLSIFHPKAPSEKTAFAFKLYDLRGTG    |     |     |     |     |
| OsCBL7 ABA54182       | (77)  | DLFD  | LKRNGVIDFGEFVRSLSIFHPKAPSEKTAFAFKLYDLRGTG    |     |     |     |     |
| TaCBL7                | (77)  | DLFD  | LKRNGVIEFEEFVRSLSHIFHPDTPMADKIAFAFRLYDLRGTG  |     |     |     |     |
| OsCBL9 ABA54184       | (157) | DLFDE | EKKNGVIEFDEFIHALSVFHP LAPLEDKINFAFRLYDLRQTG  |     |     |     |     |
| TaCBL9                | (163) | DLFDE | EKKNGVIEFEEFIHALSVFHP LAPVEDKINFAFRLYDLRQTG  |     |     |     |     |
| AtCBL1 AAC26008       | (77)  | DMFD  | VKRKGVIDFGDFVRSLSNVFHPNASLEDKIDFTFRLYDMDCGT  |     |     |     |     |
| AtCBL9 AF411958_1     | (77)  | DLFD  | VKRKGVIDFGDFVRSLSNVFHPNASLEEKTDFTFRLYDMDCGT  |     |     |     |     |
| OsCBL1 ABA54176       | (77)  | DLFD  | VKKRGVIDFGDFVRSLSNVFHPNIPMEEKIDFSFKLYDMDN TG |     |     |     |     |
| TaCBL1                | (79)  | DLFD  | VKKRGVIDFGDFVRSLSNVFHPNIPVEEKIDFSFKLYDMDGTG  |     |     |     |     |
| AtCBL7 AF290434_1     | (80)  | DLFD  | TNHDLGLGFEEFARALS VFHSPAPIDDKIDLSFQLYDLKQQG  |     |     |     |     |
| AtCBL6 AF192884_1     | (86)  | DLFD  | TKNTGILDFEAFARALS VFHPNAKFDKIEFSFKLYDLNQQG   |     |     |     |     |
| AtCBL2 AAC26009       | (92)  | DLFD  | TKHNGILGFEEFARALS VFHPNAPIDDKIHFSFQLYDLKQQG  |     |     |     |     |
| AtCBL3 AAC26010       | (92)  | DLFD  | TKHNGILGFEEFARALS VFHPNAPIEDKIDFSFQLYDLKQQG  |     |     |     |     |
| OsCBL2 ABA54177       | (91)  | DLFD  | TKHNGILGFDFEFARALS VFHSPAPLDEKIDFSFQLYDLKQQG |     |     |     |     |
| OsCBL3 ABA99199       | (91)  | DLFD  | TKHNGILGFDFEFARALS VFHSPAPLDEKIDFSFQLYDLKQQG |     |     |     |     |
| TaCBL2                | (91)  | DLFD  | TKHNGILGFEEFARALS VFHPNASVEEKIDFSFQLYDLKQQG  |     |     |     |     |
| TaCBL3                | (91)  | DLFD  | TKHNGILGFEEFARALS VFHSPAPPEEKIDFSFQLYDLKQQG  |     |     |     |     |
| OsCBL6 ABA54181       | (92)  | DLFD  | TKHNGILGFEEFARALS VFHPNAPIDDKIDFAFKLYDLKQQG  |     |     |     |     |
| TaCBL6                | (92)  | DLFD  | TKHNGILEFEEFVRSLS VFHPNAPVDDKIDFAFKLYDLKQQG  |     |     |     |     |
| Consensus (185)       |       | DLFD  | K NGVIDF EFVRSLSVFHP APLEEKI FAFRLYDLKQQG    |     |     |     |     |

EF hand 2

EF hand 3

|                       | (231) | 231                                               | 240                                      | 250 | 260 | 276 |
|-----------------------|-------|---------------------------------------------------|------------------------------------------|-----|-----|-----|
| AtCAM1 NP_001154755   | (126) | FISAAELRHVMTNLG-----EKL TDEE--VDEMIREADV DGDGQI   |                                          |     |     |     |
| OsCaM LOC_Os05g41210  | (100) | FISAAELRHVMTNLG-----EKL TDEE--VDEMIREADV DGDGQI   |                                          |     |     |     |
| AtCAM2 NP_001189724   | (112) | FISAAELRHVMTNLG-----EKL TDEE--VDEMIK EADV DGDGQI  |                                          |     |     |     |
| OsCaM3 LOC_Os01g17190 | (100) | FISAAELRHVMTNLG-----EKL TDEE--VDEMIREADV DGDGQI   |                                          |     |     |     |
| CeCaM NP_503386       | (100) | FISAAELRHVMTNLG-----EKL TDEE--VDEMIREADV DGDGQV   |                                          |     |     |     |
| DrCaM BC164893        | (100) | YISAAELRHVMTNLG-----EKL TDEE--VDEMIREADV DGDGQV   |                                          |     |     |     |
| HsCML3 NP_005176      | (100) | FVSAAELRHVMTNLG-----EKL SDEE--VDEMIRAADTDGDGQV    |                                          |     |     |     |
| ScCaM NP_009667       | (100) | LISAAELKHVLTSLG-----EKL TDAE--VDMLREVS-DGSGEI     |                                          |     |     |     |
| MmCam4 NP_064420      | (99)  | YITVDELKESLSKLG-----E SLSQEE--LEDMIRVADV DQDGKV   |                                          |     |     |     |
| AtCBL4 AF192886       | (127) | FIEREELKEMVVALHSEELVLS EDMIEMVVDKAFVQADRKNDGKI    |                                          |     |     |     |
| OsCBL4 ABA54179       | (123) | YIEKEELREMVALLDES DLHLSECAVEAIVDNTFSQADSNGDGRI    |                                          |     |     |     |
| TaCBL4                | (125) | YIEKEELREMVALLDES DLCLSDSAVEAIVDNTFSQADSNGDRI     |                                          |     |     |     |
| OsCBL7 ABA54182       | (123) | YIEREELYEMVLATLINES DILLSDDAVEQIVDQTFKQADLNSDGKI  |                                          |     |     |     |
| TaCBL7                | (123) | SIEREELKEMVLATLINES DILLSDDAVQQIVDQTFKQADLNSDGRI  |                                          |     |     |     |
| OsCBL9 ABA54184       | (203) | FIEREVVMQVIAILLSESDMKLSEELLEAIIDKTFE DADADR DGKI  |                                          |     |     |     |
| TaCBL9                | (209) | FIEREVVMQVIAILLSESHVELSHDLLEAILDKTFE DADTD RDGKI  |                                          |     |     |     |
| AtCBL1 AAC26008       | (123) | YIERQEVKQMLIAILLCESEMKLADDTIETIILDKTFE DADVNDGKI  |                                          |     |     |     |
| AtCBL9 AF411958_1     | (123) | FIERQEVKQMLIAILLCESEMKLADDTIEMILDQTFE DADVDR DGKI |                                          |     |     |     |
| OsCBL1 ABA54176       | (123) | FIERKEVKQMLIAILLGESEMRLSDEIETIILDKTFE DADTNQDGRI  |                                          |     |     |     |
| TaCBL1                | (125) | FIERKEVKQMLIAILLGESEMRLSDEIVEITLDKAFSDADTNQDGKI   |                                          |     |     |     |
| AtCBL7 AF290434_1     | (126) | FIERQGVKQLVVATLAESGMSQSDIEVESIIDKTFEADTKHLDGMI    |                                          |     |     |     |
| AtCBL6 AF192884_1     | (132) | YIKRQEVKQMVVRLTAESGMNLS DHVIESIIDKTFEADTKLDGKI    |                                          |     |     |     |
| AtCBL2 AAC26009       | (138) | FIERQEVKQMVVATLAESGMNLSKDTVIEDIIDKTFEADTKHDGKI    |                                          |     |     |     |
| AtCBL3 AAC26010       | (138) | FIERQEVKQMVVATLAESGMNLSDEIIESIIDKTFEADTKHDGRI     |                                          |     |     |     |
| OsCBL2 ABA54177       | (137) | YIERQEVKQMVVATLAESGMNLSDEIIESIIDKTFEADTKHDGRI     |                                          |     |     |     |
| OsCBL3 ABA99199       | (137) | YIERQEVKQMVVATLAESGMNLSDEIIESIIDKTFEADTKHDGRI     |                                          |     |     |     |
| TaCBL2                | (137) | FIERQEVKQMVVATLAESGMNLSDEIENIIDKTFEADTKHDGKI      |                                          |     |     |     |
| TaCBL3                | (137) | FIERQEVKQMVVATLAESGMNLSDEVIIESIIDKTFEADTKHDGKI    |                                          |     |     |     |
| OsCBL6 ABA54181       | (138) | FIERQEVKQMVVATLAESGMNLSDEIIEGIIIDKTFEADTKHDGKI    |                                          |     |     |     |
| TaCBL6                | (138) | FIERQEVKQMVVATLAESGMNLSDEVIIEGIIIDKTFEADTKHDGKI   |                                          |     |     |     |
| Consensus (231)       |       | FIER                                              | EVKQMVVALL ES M LSDEIIE IVDKTFE ADT DGKI |     |     |     |

EF hand 3

EF hand 4

|                             | (277) | <u>277</u> |    | 290 |     | 300   |       | 310   |       | 322   |
|-----------------------------|-------|------------|----|-----|-----|-------|-------|-------|-------|-------|
| AtCAM1 NP_001154755 (164)   | NY    | EEF        | VK | IM  | MAK | ----- | ----- | ----- | ----- | ----- |
| OsCaM LOC_Os05g41210 (138)  | NY    | EEF        | VK | V   | MAK | ----- | ----- | ----- | ----- | ----- |
| AtCAM2 NP_001189724 (150)   | NY    | EEF        | VK | V   | MAK | ----- | ----- | ----- | ----- | ----- |
| OsCaM3 LOC_Os01g17190 (138) | NY    | DEF        | VK | V   | MAK | ----- | ----- | ----- | ----- | ----- |
| CeCaM NP_503386 (138)       | NY    | EEF        | V  | T   | M   | T     | T     | K     | ----- | ----- |
| DrCaM BC164893 (138)        | NY    | EEF        | V  | Q   | M   | T     | A     | K     | ----- | ----- |
| HsCML3 NP_005176 (138)      | NY    | EEF        | V  | R   | V   | L     | V     | S     | K     | ----- |
| ScCaM NP_009667 (137)       | NI    | QQ         | F  | A   | A   | L     | I     | S     | K     | ----- |
| MmCam4 NP_064420 (137)      | KY    | EEF        | V  | R   | L   | H     | V     | E     | N     | ----- |
| AtCBL4 AF192886 (173)       | DI    | DEW        | K  | D   | F   | V     | S     | L     | N     | P     |
| OsCBL4 ABA54179 (169)       | DP    | EEW        | E  | E   | F   | V     | K     | A     | N     | P     |
| TaCBL4 (171)                | DP    | KEE        | E  | E   | F   | V     | K     | K     | N     | P     |
| OsCBL7 ABA54182 (169)       | DP    | DEW        | K  | A   | F   | A     | S     | K     | N     | P     |
| TaCBL7 (169)                | DP    | DEW        | K  | E   | F   | A     | S     | K     | N     | P     |
| OsCBL9 ABA54184 (249)       | NQ    | QEW        | K  | E   | F   | V     | L     | R     | H     | P     |
| TaCBL9 (255)                | CQ    | EEW        | K  | E   | F   | V     | L     | R     | H     | P     |
| AtCBL1 AAC26008 (169)       | DK    | LEW        | S  | D   | E   | V     | N     | K     | N     | P     |
| AtCBL9 AF411958_1 (169)     | DK    | T          | E  | W   | S   | N     | F     | V     | I     | K     |
| OsCBL1 ABA54176 (169)       | DR    | T          | E  | W   | E   | N     | F     | V     | S     | R     |
| TaCBL1 (171)                | DR    | T          | E  | W   | E   | N     | F     | V     | S     | R     |
| AtCBL7 AF290434_1 (172)     | DE    | EEW        | M  | D   | L   | V     | F     | R     | H     | P     |
| AtCBL6 AF192884_1 (178)     | DK    | EEW        | R  | S   | L   | V     | L     | R     | H     | P     |
| AtCBL2 AAC26009 (184)       | DK    | EEW        | R  | S   | L   | V     | L     | R     | H     | P     |
| AtCBL3 AAC26010 (184)       | DK    | EEW        | R  | T   | L   | V     | L     | R     | H     | P     |
| OsCBL2 ABA54177 (183)       | DK    | EEW        | R  | N   | L   | V     | L     | R     | H     | P     |
| OsCBL3 ABA99199 (183)       | DK    | EEW        | R  | N   | L   | V     | L     | R     | H     | P     |
| TaCBL2 (183)                | DR    | EEW        | H  | N   | L   | V     | L     | R     | H     | P     |
| TaCBL3 (183)                | DK    | EEW        | R  | N   | L   | V     | L     | R     | H     | P     |
| OsCBL6 ABA54181 (184)       | DK    | EEW        | R  | N   | L   | V     | L     | R     | H     | P     |
| TaCBL6 (184)                | DK    | EEW        | R  | N   | L   | V     | L     | R     | H     | P     |
| Consensus (277)             | D     | EEW        | L  | V   | L   | R     | P     | S     | L     | L     |

EF hand 4

|                             | (323) | <u>323</u> | <u>326</u> |
|-----------------------------|-------|------------|------------|
| AtCAM1 NP_001154755 (176)   | ----  | ----       | ----       |
| OsCaM LOC_Os05g41210 (150)  | ----  | ----       | ----       |
| AtCAM2 NP_001189724 (162)   | ----  | ----       | ----       |
| OsCaM3 LOC_Os01g17190 (150) | ----  | ----       | ----       |
| CeCaM NP_503386 (150)       | ----  | ----       | ----       |
| DrCaM BC164893 (150)        | ----  | ----       | ----       |
| HsCML3 NP_005176 (150)      | ----  | ----       | ----       |
| ScCaM NP_009667 (148)       | ----  | ----       | ----       |
| MmCam4 NP_064420 (149)      | ----  | ----       | ----       |
| AtCBL4 AF192886 (219)       | NV    | S          | S          |
| OsCBL4 ABA54179 (211)       | ----  | ----       | ----       |
| TaCBL4 (217)                | SK    | --         | ----       |
| OsCBL7 ABA54182 (214)       | ----  | ----       | ----       |
| TaCBL7 (214)                | ----  | ----       | ----       |
| OsCBL9 ABA54184 (291)       | ----  | ----       | ----       |
| TaCBL9 (297)                | ----  | ----       | ----       |
| AtCBL1 AAC26008 (214)       | ----  | ----       | ----       |
| AtCBL9 AF411958_1 (214)     | ----  | ----       | ----       |
| OsCBL1 ABA54176 (214)       | ----  | ----       | ----       |
| TaCBL1 (216)                | ----  | ----       | ----       |
| AtCBL7 AF290434_1 (215)     | ----  | ----       | ----       |
| AtCBL6 AF192884_1 (224)     | LDG   | --         | ----       |
| AtCBL2 AAC26009 (227)       | ----  | ----       | ----       |
| AtCBL3 AAC26010 (227)       | ----  | ----       | ----       |
| OsCBL2 ABA54177 (226)       | ----  | ----       | ----       |
| OsCBL3 ABA99199 (226)       | ----  | ----       | ----       |
| TaCBL2 (226)                | ----  | ----       | ----       |
| TaCBL3 (226)                | ----  | ----       | ----       |
| OsCBL6 ABA54181 (227)       | ----  | ----       | ----       |
| TaCBL6 (227)                | ----  | ----       | ----       |
| Consensus (323)             | ----  | ----       | ----       |

**Additional file 5:** Analysis of EF-hand motifs in calcium binding proteins of representative species. Multiple sequence alignment was performed using the ClustalX1.83. Identical amino acids are shaded in yellow, conservative amino acids are shaded in light blue and similar amino acids are shaded in green. The four EF-hand motifs are indicated in the figure.
