# Supplementary material for: Identification and comprehensive analyses of the CBL and CIPK gene families in wheat (Triticum aestivum L.)
Source: PubMed Central journal article supplement (PMC4634908; doi:10.1186/s12870-015-0657-4), 2015-11-04
Supplement: 12870_2015_657_MOESM6_ESM.pdf [file 12870_2015_657_MOESM6_ESM.pdf]

## Catalytic domain of the Serine/Threonine Kinases

|                        |      | 93                      | 100                    | 110   | 120                  | 138  |
|------------------------|------|-------------------------|------------------------|-------|----------------------|------|
| AtSnRK2.4 At1g10940    | (39) | -----                   | -----                  | ----- | PKIDENVAREIINHRSLR   | ---- |
| AtSnRK2.9 AT2G23030    | (39) | -----                   | -----                  | ----- | YKIDENVAREIINHRAIN   | ---- |
| HsSnRK NP_001094064    | (54) | -----                   | -----                  | ----- | TLATGHLFQEVRCMKLVQ   | ---- |
| MmSnRK NP_001158044.1  | (54) | -----                   | -----                  | ----- | TLATGHLFQEVRCMKLVQ   | ---- |
| OsSnRK 1a Os05g0530500 | (51) | -----                   | -----                  | ----- | MEEEKVKKREIKILRIFM   | ---- |
| OsSnRK1b Os08g0484600  | (56) | -----                   | -----                  | ----- | MEMEAKAKREIKILRIFI   | ---- |
| ZmSnRK NP_001105673.1  | (56) | -----                   | -----                  | ----- | MEMEAKAKREFKILRIFI   | ---- |
| TaCIPK20               | (93) | RDQRDEASQPPQHSQDTRGSCSN | FHHSILLVAQASSLRTHAESNP |       |                      |      |
| TaCIPK17               | (66) | -----                   | -----                  | ----- | ADDQVRREIATITMLA     | ---- |
| TaCIPK21               | (54) | -----                   | -----                  | ----- | IDEQIKTEIATLKLK      | ---- |
| AtSOS2 AAF62923.1      | (52) | -----                   | -----                  | ----- | MVDQIKREISIMKIVR     | ---- |
| TaCIPK24               | (54) | -----                   | -----                  | ----- | MIQQIKKEISIMKIVR     | ---- |
| TaCIPK8                | (57) | -----                   | -----                  | ----- | MVDQIKREISIMKIVR     | ---- |
| TaCIPK23               | (66) | -----                   | -----                  | ----- | MIAQIKREISIMKIVR     | ---- |
| TaCIPK3                | (60) | -----                   | -----                  | ----- | LVEQIRREICTMKLIQ     | ---- |
| TaCIPK31               | (61) | -----                   | -----                  | ----- | LVEQIRREICTMKLIK     | ---- |
| TaCIPK32               | (54) | -----                   | -----                  | ----- | MVEQIKREIATMKLIK     | ---- |
| TaCIPK9                | (58) | -----                   | -----                  | ----- | MVEQIKREIATMKLIR     | ---- |
| TaCIPK22               | (63) | -----                   | -----                  | ----- | KAAAARRSVERELAAIRVQG | ---- |
| TaCIPK29               | (73) | -----                   | -----                  | ----- | EGSAGSAAIEREAAILARLR | ---- |
| TaCIPK4                | (59) | -----                   | -----                  | ----- | NAPRVLQEVAMRRLR      | ---- |
| TaCIPK7                | (61) | -----                   | -----                  | ----- | MDARVLGEVAMRRLR      | ---- |
| TaCIPK12               | (87) | -----                   | -----                  | ----- | LVPHIKREITILRRVR     | ---- |
| TaCIPK19               | (87) | -----                   | -----                  | ----- | LVSHIKREIIVLRVR      | ---- |
| TaCIPK25               | (52) | -----                   | -----                  | ----- | AWQQIKREIIVMRRLR     | ---- |
| TaCIPK13               | (78) | -----                   | -----                  | ----- | ITAHIKREIIVLRVR      | ---- |
| TaCIPK10               | (54) | -----                   | -----                  | ----- | LMDQVRREISVMKLVK     | ---- |
| TaCIPK2                | (54) | -----                   | -----                  | ----- | ITDQIKREISVMKLVK     | ---- |
| TaCIPK11               | (54) | -----                   | -----                  | ----- | LMEQIKREISVMRLVK     | ---- |
| TaCIPK26               | (53) | -----                   | -----                  | ----- | LIVQIKREISIMGLVR     | ---- |
| TaCIPK28               | (52) | -----                   | -----                  | ----- | LVDQIKREISIMRIVR     | ---- |
| TaCIPK14               | (63) | -----                   | -----                  | ----- | ISEQIRREIVTMRIVA     | ---- |
| TaCIPK15               | (53) | -----                   | -----                  | ----- | LAEQVRREITMRLVT      | ---- |
| TaCIPK5                | (53) | -----                   | -----                  | ----- | MIDQIKREISIMRLVR     | ---- |
| TaCIPK27               | (57) | -----                   | -----                  | ----- | MVEQIKREIIVMKMVS     | ---- |
| TaCIPK6                | (57) | -----                   | -----                  | ----- | MVEQIKREIIVMKMVS     | ---- |
| TaCIPK30               | (57) | -----                   | -----                  | ----- | TVEQVKREIVDMRVRH     | ---- |
| TaCIPK16               | (1)  | -----                   | -----                  | ----- | MVEQLRREISIMRIVR     | ---- |
| Consensus              | (93) |                         |                        |       | MVEQIKREISIMRLVR     |      |

## Catalytic domain of the Serine/Threonine Kinases

|                        |       | 139                    | 150                   | 160        | 170 | 184 |
|------------------------|-------|------------------------|-----------------------|------------|-----|-----|
| AtSnRK2.4 At1g10940    | (57)  | --HPNIIRFKEVVLTPTHLAIA | AMEYAAAGGELFERI       | CSAGR--FSE | ED  |     |
| AtSnRK2.9 AT2G23030    | (57)  | --HPNIVRFKEVVLTPTHLGIV | MEYAAAGGELFERISSVGR   | --FSE      | EA  |     |
| HsSnRK NP_001094064    | (72)  | --HPNIVRLYEVIDTQTKLYL  | LILELGDGDMFDYIMHEEG   | --LNE      | ED  |     |
| MmSnRK NP_001158044.1  | (72)  | --HPNIVRLYEVIDTQTKLYL  | LILELGDGDMFDYIMHEEG   | --LNE      | ED  |     |
| OsSnRK 1a Os05g0530500 | (69)  | --HPHIIRLYEVIDTPADIVV  | MEYVYKSGELFDYIIVEKGR  | --LQE      | ED  |     |
| OsSnRK1b Os08g0484600  | (74)  | --HPHIIRLYEVIYTPDIYV   | MEYCKFGELFDYIIVEKGR   | --LQE      | ED  |     |
| ZmSnRK NP_001105673.1  | (74)  | --HPHIIRLYEVIYTPDIYV   | MEYCKYKSGELFDYIIVEKGR | --LQE      | ED  |     |
| TaCIPK20               | (139) | LSRLTAVTFAQVIATKTKIC   | LVMEYVGGQLSDKLSYLK    | --RL       | ED  |     |
| TaCIPK17               | (82)  | --HPNVVRLHEVAAASKTKIY  | MVLEFVNGGELFDRIAMK    | --GKL      | SER |     |
| TaCIPK21               | (70)  | --HPNVVRLHEVAAASKTKIY  | MVLEFVNGGELFEKIALK    | --GKL      | SEK |     |
| AtSOS2 AAF62923.1      | (68)  | --HPNIVRLHEVLAASPSKIY  | IVLEFVTCGELFDRIVHK    | --GRL      | ES  |     |
| TaCIPK24               | (70)  | --HPNIIRLNEVLGGQTKIYI  | IMELFTGGELFDKIIARQ    | --GKL      | REN |     |
| TaCIPK8                | (73)  | --HPNVVRLHEVLASRKKIF   | IILEFTTCGELFDKIIARH   | --GRL      | SEA |     |
| TaCIPK23               | (82)  | --HPNIVIRMEVMASRTKIY   | IVMELFTGGELFDKIIASR   | --GRL      | KED |     |
| TaCIPK3                | (76)  | --HPNVVRLHEVMGSKARIF   | VILEYVTCGELFDHIIAR    | --GSL      | KED |     |
| TaCIPK31               | (77)  | --HPNVVRLHEVMGSKARIF   | VILEYVTCGELFDHIIAR    | --GSL      | KED |     |
| TaCIPK32               | (70)  | --HPNVVCLHEVMGSKTKIY   | IVLEYVTCGELFDHIIAR    | --GRM      | RED |     |
| TaCIPK9                | (74)  | --HPNVVQLHEVMASRSKIY   | MVLEFVEGELFDHIIARS    | --GKL      | GED |     |
| TaCIPK22               | (84)  | --HPHVMLLDVLAASRTVY    | LVLELARGGTLSDAMDR     | --GRF      | ED  |     |
| TaCIPK29               | (93)  | --HRHVRLHEILGTRKQVH    | FVLDLAAGGELFSLVDS     | --GRM      | TE  |     |
| TaCIPK4                | (75)  | --HPGVIRLHEVLATRASIV   | YLVMEAPRGDLQSRLAAL    | PSHRFSE    | EK  |     |
| TaCIPK7                | (77)  | --HPNVIRLHEVLATRSKVY   | LVMEAPRGDLQSRLAAL     | PKRRLP     | EH  |     |
| TaCIPK12               | (103) | --HPNIVHLFEVMATKSKIY   | FVMEYVGGELFDKIIAR     | --GRL      | KED |     |
| TaCIPK19               | (103) | --HPNIVHLFEVMATKTKIY   | FVMEYVGGELFDKIIAR     | --GRL      | KED |     |
| TaCIPK25               | (68)  | --HPNIVQLHKVMAACKSRI   | FVMEYVGGELFDKIIAR     | --GRL      | KED |     |
| TaCIPK13               | (94)  | --HPHIVQLYEVMATKTKIY   | FVMEYVGGELFDKIIAR     | --GRL      | KED |     |
| TaCIPK10               | (70)  | --HPNIVQLYEVMATKTKIY   | FVMEYVGGELFDKIIAR     | --GRL      | KED |     |
| TaCIPK2                | (70)  | --HPNIVQMYEVMATKTKIY   | FVLEHVKGELFDKIIAR     | --GRL      | KED |     |
| TaCIPK11               | (70)  | --HPNIVQLFEVMATKSKIY   | FVLEYAKGELFDKIIAR     | --GRL      | KED |     |
| TaCIPK26               | (69)  | --HPNVKLFEVMASRSKIY    | FVLEYAKGELFDKIIAR     | --GRL      | KED |     |
| TaCIPK28               | (68)  | --HPNIVQLFEVMATRSKIY   | FVLEYAKGELFDKIIAR     | --GRL      | SE  |     |
| TaCIPK14               | (79)  | --HKNIVQLFEVMATRNKIY   | FVMEYVGGELFDKIIAR     | --GKL      | AE  |     |
| TaCIPK15               | (69)  | --HKSIVQLFEVMATRSKIY   | FVMEYVGGELFDKIIAR     | --GKL      | TE  |     |
| TaCIPK5                | (69)  | --HPNIVQLHEVMASRTKIY   | FAMEYVGGELFDKIIAR     | --GRL      | KED |     |
| TaCIPK27               | (73)  | --HPNIVQLHEVLATRTKIY   | LALELVRGGELFDKIIAR    | --GRL      | RED |     |
| TaCIPK6                | (73)  | --HPNIVELHEVLATRTKIY   | LALELVRGGELFDKIIAR    | --GRL      | RED |     |
| TaCIPK30               | (73)  | --HPNVVRLHEVMATRSRIY   | FVMEYASGGELFDRLAK     | --TRF      | PEP |     |
| TaCIPK16               | (17)  | --HPNVVGLREVLAASRQRF   | VFVMEYVGGELFDKIIAR    | --GRL      | TE  |     |
| Consensus              | (139) | HPNIVRLHEVMATKTKIYIV   | LEVYVGGELFDKIIAR      | GRL        | ED  |     |

## Catalytic domain of the Serine/Threonine Kinases

|                              | (185) | 185 | 190 | 200 | 210 | 220 | 230 |   |   |   |   |   |   |   |   |   |   |   |   |   |   |   |   |   |   |   |     |     |     |     |   |   |   |   |   |   |     |     |     |     |   |   |   |   |   |
|------------------------------|-------|-----|-----|-----|-----|-----|-----|---|---|---|---|---|---|---|---|---|---|---|---|---|---|---|---|---|---|---|-----|-----|-----|-----|---|---|---|---|---|---|-----|-----|-----|-----|---|---|---|---|---|
| AtSnRK2.4 At1g10940 (99)     | E     | A   | R   | Y   | F   | Q   | Q   | L | I | S | G | V | S | Y | C | H | A | M | Q | I | C | H | R | D | L | K | L   | K   | L   | --- | E | N | T | L | L | D | G   | S   | P   | A   | P | R | L | K | I |
| AtSnRK2.9 AT2G23030 (99)     | E     | A   | R   | Y   | F   | Q   | Q   | L | I | C | G | V | H | L | H | A | L | Q | I | C | H | R | D | L | K | L | K   | L   | --- | E   | N | T | L | L | D | G | S   | P   | A   | P   | R | L | K | I |   |
| HsSnRK NP_001094064 (115)    | L     | A   | K   | K   | Y   | F   | A   | Q | I | V | H | A | I | S | Y | C | H | K | L | H | V | V | H | R | D | L | K   | F   | --- | E   | N | V | V | F | F | F | E   | K   | Q   | G   | - | L | V | K | L |
| MmSnRK NP_001158044.1 (115)  | L     | A   | K   | K   | Y   | F   | A   | Q | I | V | H | A | I | S | Y | C | H | K | L | H | V | V | H | R | D | L | K   | F   | --- | E   | N | V | V | F | F | F | E   | K   | Q   | G   | - | L | V | K | L |
| OsSnRK 1a Os05g0530500 (111) | E     | A   | R   | R   | F   | Q   | Q   | I | S | G | V | E | Y | C | H | R | N | M | V | V | H | R | D | L | K | F | --- | E   | N   | L   | L | L | D | S | K | C | N   | --- | V   | K   | I |   |   |   |   |
| OsSnRK1b Os08g0484600 (116)  | E     | A   | R   | R   | F   | Q   | Q   | I | S | G | V | E | Y | C | H | R | N | M | V | V | H | R | D | L | K | F | --- | E   | N   | L   | L | L | D | S | K | Y | N   | --- | V   | K   | L |   |   |   |   |
| ZmSnRK NP_001105673.1 (116)  | E     | A   | R   | R   | F   | Q   | Q   | I | S | G | V | E | Y | C | H | R | N | M | V | V | H | R | D | L | K | F | --- | E   | N   | L   | L | L | D | S | K | Y | N   | --- | V   | K   | L |   |   |   |   |
| TaCIPK20 (128)               | E     | A   | K   | K   | Y   | F   | Q   | Q | L | I | D | A | V | D | Y | C | H | R | R | G | V | F | H | R | D | L | K   | F   | --- | E   | N | L | L | L | D | N | Q   | Y   | N   | --- | L | K | V |   |   |
| TaCIPK17 (184)               | E     | G   | R   | R   | L   | F   | Q   | Q | L | I | D | G | V | S | Y | C | H | G | K | G | V | F | H | R | D | L | K   | F   | --- | E   | N | V | L | I | D | R | K   | G   | N   | --- | I | K | I |   |   |
| TaCIPK21 (112)               | E     | G   | R   | R   | L   | F   | Q   | Q | L | M | D | A | I | S | Y | C | H | E | R | G | V | F | H | R | D | L | K   | F   | --- | E   | N | V | L | V | D | A | K   | G   | N   | --- | I | K | V |   |   |
| AtSOS2 AAF62923.1 (110)      | E     | S   | R   | K   | Y   | F   | Q   | Q | L | V | D | A | V | A | H | C | H | C | K | G | V | F | H | R | D | L | K   | F   | --- | E   | N | L | L | L | D | T | N   | G   | N   | --- | L | K | V |   |   |
| TaCIPK24 (112)               | E     | A   | R   | K   | Y   | F   | Q   | Q | L | I | D | A | I | N | Y | C | H | S | K | G | V | F | H | R | D | L | K   | F   | --- | E   | N | L | L | L | D | S | R   | G   | N   | --- | L | K | V |   |   |
| TaCIPK8 (115)                | D     | A   | R   | K   | Y   | F   | Q   | Q | L | I | D | G | V | F | C | H | S | K | G | V | F | H | R | D | L | K | F   | --- | E   | N   | L | L | L | D | S | Q | G   | N   | --- | L   | K | I |   |   |   |
| TaCIPK23 (124)               | D     | A   | R   | K   | Y   | F   | Q   | Q | L | I | N | A | V | D | Y | C | H | S | R | G | V | F | H | R | D | L | K   | F   | --- | E   | N | L | L | L | D | A | N   | G   | T   | --- | L | K | V |   |   |
| TaCIPK3 (118)                | E     | A   | R   | R   | Y   | F   | Q   | Q | L | I | N | A | V | D | Y | C | H | S | R | G | V | F | H | R | D | L | K   | L   | --- | E   | N | L | L | L | D | T | A   | G   | N   | --- | L | K | V |   |   |
| TaCIPK31 (119)               | E     | A   | R   | R   | Y   | F   | Q   | Q | L | I | N | A | V | D | Y | C | H | S | R | G | V | F | H | R | D | L | K   | L   | --- | E   | N | L | L | L | D | A | A   | G   | N   | --- | L | K | V |   |   |
| TaCIPK32 (112)               | E     | A   | R   | R   | Y   | F   | Q   | Q | L | I | N | A | V | D | Y | C | H | S | R | G | V | F | H | R | D | L | K   | F   | --- | E   | N | L | L | L | D | S | C   | G   | N   | --- | L | K | V |   |   |
| TaCIPK9 (116)                | E     | A   | R   | R   | Y   | F   | H   | Q | L | I | N | A | V | D | Y | C | H | S | R | G | V | F | H | R | D | L | K   | F   | --- | E   | N | L | L | L | D | S | Y   | G   | A   | --- | L | K | V |   |   |
| TaCIPK22 (126)               | T     | S   | R   | R   | L   | F   | V   | Q | L | V | S | A | L | A | V | H | S | R | G | V | F | H | R | D | V | K | F   | --- | E   | N   | L | L | L | D | E | H | G   | D   | --- | L   | K | L |   |   |   |
| TaCIPK29 (135)               | L     | A   | R   | H   | Y   | F   | R   | Q | L | V | S | A | V | R | Y | C | H | S | R | G | V | F | H | R | D | L | K   | F   | --- | E   | N | L | L | L | D | G | Q   | D   | --- | L   | K | V |   |   |   |
| TaCIPK4 (119)                | A     | A   | R   | R   | V   | F   | V   | Q | L | T | V | A | L | A | H | C | H | A | R | G | V | T | H | R | D | L | K   | F   | --- | Q   | N | L | L | L | D | G | A   | G   | N   | --- | L | K | V |   |   |
| TaCIPK7 (121)                | A     | A   | R   | R   | V   | F   | L   | Q | L | V | S | A | L | I | Y | C | H | A | R | G | V | F | H | R | D | V | K   | F   | --- | Q   | N | V | L | T | D | A | D   | G   | N   | --- | L | K | V |   |   |
| TaCIPK12 (144)               | T     | A   | R   | R   | V   | F   | Q   | Q | L | I | S | A | V | G | F | C | H | A | R | G | V | F | H | R | D | L | K   | F   | --- | E   | N | L | L | V | D | E | R   | G   | D   | --- | L | K | V |   |   |
| TaCIPK19 (142)               | I     | A   | R   | R   | Y   | F   | Q   | H | L | I | S | A | V | G | F | C | H | T | R | G | V | F | H | R | D | L | K   | F   | --- | E   | N | L | L | V | E | A | G   | N   | --- | L   | K | V |   |   |   |
| TaCIPK25 (110)               | E     | T   | R   | R   | I   | F   | Q   | Q | L | V | S | A | L | T | F | C | H | A | Q | G | V | F | H | R | D | L | K   | F   | --- | D   | N | L | L | V | D | E | H   | G   | N   | --- | L | K | V |   |   |
| TaCIPK13 (135)               | E     | A   | R   | R   | Y   | F   | Q   | Q | L | V | S | A | V | A | F | C | H | A | R | G | V | F | H | R | D | L | K   | F   | --- | E   | N | L | L | L | D | D | A   | G   | D   | --- | L | K | V |   |   |
| TaCIPK10 (111)               | V     | A   | R   | R   | Y   | F   | Q   | Q | L | N | S | A | V | D | F | C | H | S | R | G | V | F | H | R | D | L | K   | F   | --- | E   | N | L | L | L | D | E | N   | R   | N   | --- | L | K | I |   |   |
| TaCIPK2 (111)                | A     | A   | R   | R   | Y   | F   | Q   | Q | L | I | C | A | V | D | F | C | H | S | R | G | V | F | H | R | D | L | K   | F   | --- | E   | N | L | L | L | D | E | N   | S   | N   | --- | L | K | V |   |   |
| TaCIPK11 (112)               | A     | A   | R   | R   | Y   | F   | H   | Q | L | I | S | A | I | D | Y | C | H | S | R | G | V | F | H | R | D | L | K   | F   | --- | E   | N | L | L | L | D | E | N   | E   | N   | --- | L | K | V |   |   |
| TaCIPK26 (110)               | A     | A   | R   | R   | Y   | F   | H   | Q | L | I | S | A | V | D | Y | C | H | S | R | G | V | F | H | R | D | L | K   | F   | --- | E   | N | L | L | L | D | E | N   | E   | N   | --- | L | K | V |   |   |
| TaCIPK28 (109)               | G     | A   | R   | T   | F   | F   | Q   | Q | L | I | S | A | I | D | Y | C | H | S | R | G | V | F | H | R | D | L | K   | F   | --- | E   | N | L | L | V | D | E | Y   | G   | T   | --- | L | R | V |   |   |
| TaCIPK14 (121)               | A     | A   | H   | K   | Y   | F   | Q   | Q | L | I | S | A | V | D | Y | C | H | S | Q | G | V | F | H | R | D | L | K   | L   | --- | E   | N | L | L | L | D | E | N   | E   | N   | --- | L | K | V |   |   |
| TaCIPK15 (111)               | A     | A   | H   | K   | Y   | F   | Q   | Q | L | I | S | A | V | D | Y | C | H | S | R | G | V | F | H | R | D | L | K   | F   | --- | E   | N | L | L | L | D | G | N   | E   | N   | --- | L | K | V |   |   |
| TaCIPK5 (110)                | A     | A   | R   | R   | Y   | F   | Q   | Q | L | I | G | A | V | D | F | C | H | S | R | D | V | F | H | R | D | L | K   | F   | --- | E   | N | L | L | V | D | E | H   | G   | N   | --- | L | K | V |   |   |
| TaCIPK27 (115)               | V     | A   | R   | R   | Y   | F   | R   | Q | L | I | S | A | V | D | F | C | H | G | R | G | V | F | H | R | D | L | K   | F   | --- | E   | N | L | L | L | D | E | A   | G   | N   | --- | L | K | V |   |   |
| TaCIPK6 (115)                | V     | A   | R   | R   | Y   | F   | R   | Q | L | I | S | A | V | D | F | C | H | G | R | G | V | F | H | R | D | L | K   | F   | --- | E   | N | L | L | L | D | E | A   | G   | N   | --- | L | K | V |   |   |
| TaCIPK30 (115)               | V     | A   | R   | R   | Y   | F   | Q   | Q | L | V | T | A | V | E | F | C | H | S | R | G | V | F | H | R | D | L | K   | F   | --- | E   | N | L | L | L | D | A | H   | G   | N   | --- | L | K | V |   |   |
| TaCIPK16 (58)                | A     | A   | R   | R   | Y   | F   | Q   | Q | L | V | A | A | V | A | F | C | H | S | R | G | V | F | H | R | D | L | K   | F   | --- | E   | N | L | L | L | D | E | E   | G   | R   | --- | L | K | V |   |   |
| Consensus (185)              | A     | R   | R   | Y   | F   | Q   | Q   | L | I | S | A | V | D | Y | C | H | S | R | G | V | F | H | R | D | L | K | F   | --- | E   | N   | L | L | L | D | G | N | --- | L   | K   | V   |   |   |   |   |   |

## Activation loop

## Catalytic domain of the Serine/Threonine Kinases

|                               | (231) | 231 | 240 | 250 | 260 | 276 |   |   |   |   |   |   |   |     |     |   |   |   |   |   |   |   |   |   |   |   |   |   |   |   |   |   |   |   |   |   |   |   |   |   |   |
|-------------------------------|-------|-----|-----|-----|-----|-----|---|---|---|---|---|---|---|-----|-----|---|---|---|---|---|---|---|---|---|---|---|---|---|---|---|---|---|---|---|---|---|---|---|---|---|---|
| AtSnRK2.4 At1g10940 (142)     | C     | D   | F   | G   | Y   | S   | K | S | L | L | H | S | R | --- | --- | P | K | S | T | V | G | T | - | P | A | Y | I | A | P | E | V | L | S | R | H | E | Y | D | G | K | M |
| AtSnRK2.9 AT2G23030 (142)     | C     | D   | F   | G   | Y   | S   | K | S | V | L | H | S | N | --- | --- | P | K | S | T | V | G | T | - | P | A | Y | I | A | P | E | V | F | C | R | S | E | Y | D | G | K | S |
| HsSnRK NP_001094064 (157)     | T     | D   | F   | G   | F   | S   | N | K | F | Q | P | G | K | --- | --- | L | T | T | S | C | G | S | - | L | A | S | A | P | E | I | L | G | D | E | Y | D | A | P | A |   |   |
| MmSnRK NP_001158044.1 (157)</ |       |     |     |     |     |     |   |   |   |   |   |   |   |     |     |   |   |   |   |   |   |   |   |   |   |   |   |   |   |   |   |   |   |   |   |   |   |   |   |   |   |

|                              | (277) | 277 | 290 | 300 | 310 | 322 |   |   |   |   |   |   |   |   |   |   |   |   |   |   |   |   |   |   |   |   |   |   |   |   |   |   |   |   |       |   |   |       |       |       |       |       |   |   |
|------------------------------|-------|-----|-----|-----|-----|-----|---|---|---|---|---|---|---|---|---|---|---|---|---|---|---|---|---|---|---|---|---|---|---|---|---|---|---|---|-------|---|---|-------|-------|-------|-------|-------|---|---|
| AtSnRK2.4 At1g10940 (181)    | ADV   | W   | S   | G   | G   | V   | T | L | V | M | L | V | G | A | Y | P | F | E | D | Q | E | D | P | K | N | F | R | K | T | I | Q | K | I | M | A     | V | Q | Y     | K     | I     | P     | D     | Y |   |
| AtSnRK2.9 AT2G23030 (181)    | V     | D   | V   | W   | S   | C   | G | V | A | L | V | M | L | V | G | A | Y | P | F | E | D | P | K | P | R | N | F | R | K | T | V | Q | K | I | M     | A | V | N     | Y     | K     | I     | P     | G | Y |
| HsSnRK NP_001094064 (196)    | V     | D   | I   | W   | S   | L   | G | V | I | L | F | M | L | V | C | Q | P | P | F | Q | E | A | N | D | S | E | T | L | T | M | I | M | D | C | K     | Y | T | V     | F     | S     | ----- |       |   |   |
| MmSnRK NP_001158044.1 (196)  | V     | D   | I   | W   | S   | L   | G | V | I | L | F | M | L | V | C | Q | P | P | F | Q | E | A | N | D | S | E | T | L | T | M | I | M | D | C | K     | Y | T | V     | F     | S     | ----- |       |   |   |
| OsSnRK 1a Os05g0530500 (191) | V     | D   | V   | W   | S   | C   | G | V | I | L | F | M | L | V | C | Q | P | P | F | D | D | E | N | I | P | N | L | F | F | K | K | I | K | G | G     | I | Y | T     | L     | F     | S     | ----- |   |   |
| OsSnRK1b Os08g0484600 (196)  | V     | D   | V   | W   | S   | C   | G | V | I | L | F | M | L | V | C | Q | P | P | F | D | D | E | N | I | P | N | L | F | F | K | K | I | K | G | G     | I | Y | T     | L     | F     | S     | ----- |   |   |
| ZmSnRK NP_001105673.1 (196)  | V     | D   | V   | W   | S   | C   | G | V | I | L | F | M | L | V | C | Q | P | P | F | D | D | E | N | I | P | N | L | F | F | K | K | I | K | G | G     | I | Y | T     | L     | F     | S     | ----- |   |   |
| TaCIPK20 (249)               | A     | D   | I   | W   | S   | C   | G | V | I | L | F | E | L | L | A | G | Y | L | P | F | Q | D | C | S | L | H | L | Y | R | R | Y | A | L | P | Q     | W | I | T     | L     | F     | P     | ----- |   |   |
| TaCIPK17 (248)               | S     | D   | I   | W   | S   | C   | G | V | I | L | Y | I | M | L | I | C | Q | L | P | F | D | R | N | M | V | V | L | Y | Q | K | I | F | K | G | D     | T | K | V     | H     | E     | ----- |       |   |   |
| TaCIPK21 (195)               | S     | D   | V   | W   | S   | C   | G | V | I | L | V | M | L | T | G | N | L | P | F | D | D | E | N | M | V | L | Y | Q | K | I | L | K | G | D | Y     | R | I | F     | K     | ----- |       |       |   |   |
| AtSOS2 AAF62923.1 (191)      | A     | D   | I   | W   | S   | C   | G | V | I | L | F | V | L | A | G | Y | L | P | F | S | E | T | D | L | P | L | G | L | Y | R | K | I | N | A | A     | E | F | S     | C     | F     | P     | ----- |   |   |
| TaCIPK24 (191)               | A     | D   | I   | W   | S   | C   | G | V | I | L | V | L | M | A | G | Y | L | P | F | E | E | N | D | L | P | T | L | Y | D | K | I | T | A | A | H     | F | S | C     | F     | D     | ----- |       |   |   |
| TaCIPK8 (196)                | A     | D   | T   | W   | S   | C   | G | V | I | L | V | L | L | A | G | Y | L | P | F | D | E | V | D | L | T | T | L | Y | G | K | I | E | T | A | E     | Y | S | F     | H     | A     | ----- |       |   |   |
| TaCIPK23 (207)               | A     | D   | L   | W   | S   | C   | G | V | I | L | F | V | L | M | A | C | Y | L | P | F | E | D | S | N | L | M | A | L | Y | K | K | I | Y | K | A     | D | F | S     | C     | F     | S     | ----- |   |   |
| TaCIPK3 (201)                | A     | D   | L   | W   | S   | C   | G | V | I | L | F | V | L | M | A | G | Y | L | P | F | E | D | N | S | A | L | Y | K | K | I | S | G | A | Q | T     | F | C | F     | S     | ----- |       |       |   |   |
| TaCIPK31 (202)               | A     | D   | L   | W   | S   | C   | G | V | I | L | F | I | L | L | A | G | Y | L | P | F | E | D | E | N | L | I | L | Y | K | K | I | S | E | A | Q     | T | F | C     | F     | S     | ----- |       |   |   |
| TaCIPK32 (195)               | A     | D   | L   | W   | S   | C   | G | V | I | L | F | V | L | L | A | G | Y | L | P | F | E | D | S | N | L | M | A | L | Y | K | K | I | S | D | A     | E | F | T     | F     | P     | ----- |       |   |   |
| TaCIPK9 (199)                | A     | D   | V   | W   | S   | C   | G | I | L | F | V | L | M | A | G | Y | L | P | F | D | D | P | N | L | M | T | L | Y | K | L | I | S | R | A | N     | V | S | C     | F     | P     | ----- |       |   |   |
| TaCIPK22 (210)               | V     | D   | V   | W   | S   | S   | G | V | A | L | F | S | L | T | A | G | Y | L | P | F | N | D | G | N | L | M | G | M | R | K | I | F | S | G | R     | F | R | C     | F     | P     | ----- |       |   |   |
| TaCIPK29 (214)               | V     | D   | I   | W   | S   | C   | G | V | I | L | F | V | L | A | G | S | L | P | F | N | D | A | S | L | N | M | Y | R | K | I | Y | A | C | R | F     | R | C | F     | N     | ----- |       |       |   |   |
| TaCIPK4 (202)                | A     | D   | A   | W   | S   | C   | G | V | T | L | F | V | L | A | G | R | L | P | F | D | D | A | N | I | P | D | M | C | R | K | A | C | R | R | Q     | V | V | P     | P     | ----- |       |       |   |   |
| TaCIPK7 (204)                | A     | D   | A   | W   | S   | C   | G | V | I | L | V | L | L | A | G | R | L | P | F | D | D | S | N | L | A | E | M | C | M | K | A | H | R | R | E     | Y | T | L     | F     | E     | ----- |       |   |   |
| TaCIPK12 (227)               | A     | D   | I   | W   | S   | C   | G | V | I | L | F | V | L | M | A | G | Y | L | P | F | H | D | Q | N | L | M | A | M | Y | R | K | I | Y | R | G     | E | F | R     | C     | F     | P     | ----- |   |   |
| TaCIPK19 (227)               | A     | D   | I   | W   | S   | C   | G | V | I | L | F | V | L | M | A | G | Y | L | P | F | H | D | Q | N | L | M | A | M | Y | R | K | V | Y | K | G     | E | F | R     | C     | F     | P     | ----- |   |   |
| TaCIPK25 (193)               | A     | D   | A   | W   | S   | C   | G | I | V | L | F | V | L | A | G | R | K | P | F | R | D | D | D | F | T | L | Y | R | T | I | C | R | G | D | Y     | R | C | F     | P     | ----- |       |       |   |   |
| TaCIPK13 (218)               | A     | D   | L   | W   | S   | C   | G | V | I | L | F | V | L | A | G | Y | L | P | F | Q | D | R | N | L | M | G | M | Y | R | K | I | H | R | G | D     | F | R | C     | F     | P     | ----- |       |   |   |
| TaCIPK10 (194)               | A     | D   | L   | W   | S   | C   | G | V | I | L | V | L | L | A | G | Y | L | P | F | Q | D | K | N | L | M | Y | K | K | I | Y | K | A | E | L | K     | W | F | S     | ----- |       |       |       |   |   |
| TaCIPK2 (194)                | A     | D   | I   | W   | S   | C   | G | V | I | L | F | V | L | L | A | G | Y | L | P | F | Q | D | K | N | L | M | Y | K | K | I | G | K | A | E | F     | K | C | F     | S     | ----- |       |       |   |   |
| TaCIPK11 (195)               | A     | D   | I   | W   | S   | S   | G | V | I | L | V | L | V | A | G | Y | L | P | F | H | E | A | N | L | I | E | M | Y | R | R | I | S | K | A | D     | F | K | C     | F     | P     | ----- |       |   |   |
| TaCIPK26 (193)               | A     | D   | I   | W   | S   | C   | G | V | I | L | F | V | L | A | G | Y | L | P | F | H | D | T | N | L | I | E | M | Y | R | K | I | S | R | A | E     | Y | R | C     | F     | P     | ----- |       |   |   |
| TaCIPK28 (192)               | A     | D   | I   | W   | S   | C   | G | V | I | L | F | V | L | A | G | Y | L | P | F | H | E | R | N | L | M | V | L | Y | R | K | I | A | K | A | E     | L | K | W     | F     | C     | P     | ----- |   |   |
| TaCIPK14 (204)               | S     | D   | I   | W   | S   | C   | G | V | I | L | F | V | L | A | G | Y | L | P | F | H | G | S | N | L | M | D | M | Y | R | K | I | E | Q | G | D     | F | R | C     | F     | S     | ----- |       |   |   |
| TaCIPK15 (194)               | S     | D   | I   | W   | S   | C   | G | V | I | L | F | V | L | A | G | Y | L | P | F | Q | G | Q | N | L | I | E | M | Y | R | K | I | E | K | G | D     | F | R | C     | F     | G     | ----- |       |   |   |
| TaCIPK5 (193)                | A     | D   | I   | W   | S   | C   | G | V | I | L | F | V | L | L | A | G | Y | L | P | F | Q | D | S | N | L | M | E | M | Y | R | K | I | S | K | G     | D | V | R     | H     | Q     | ----- |       |   |   |
| TaCIPK27 (198)               | A     | D   | I   | W   | S   | C   | G | V | I | L | V | L | L | V | G | A | L | P | F | Q | D | E | N | L | M | S | M | Y | R | K | M | Q | R | G | G     | F | L | C     | F     | S     | ----- |       |   |   |
| TaCIPK6 (198)                | A     | D   | I   | W   | S   | C   | G | V | I | L | V | L | L | V | G | A | L | P | F | Q | D | E | N | L | M | S | M | Y | R | K | M | Q | R | G | G     | F | L | C     | F     | S     | ----- |       |   |   |
| TaCIPK30 (202)               | A     | D   | I   | W   | S   | C   | G | V | I | L | F | V | L | L | A | G | R | L | P | F | H | D | T | N | L | M | L | L | Y | K | R | I | A | R | S     | D | Y | K     | C     | F     | A     | ----- |   |   |
| TaCIPK16 (141)               | A     | D   | M   | W   | S   | C   | G | V | I | L | V | L | L | C | G | L | P | F | Q | H | D | N | Y | K | M | Y | Q | K | I | F | K | G | E | Y | Q     | M | P | ----- |       |       |       |       |   |   |
| Consensus (277)              | AD    | I   | W   | S   | C   | G   | V | I | L | F | V | L | L | A | G | Y | L | P | F | D | N | L | M | L | Y | R | K | I | K | G | E | F | C | P | ----- |   |   |       |       |       |       |       |   |   |

### Catalytic domain of the Serine/Threonine Kinases

|                              | (323) | 323 | 330 | 340 | 350 | 368 |   |   |   |   |   |   |   |   |   |   |   |   |   |   |   |   |   |   |   |   |   |   |   |   |   |   |   |   |   |   |   |   |   |   |   |   |   |   |   |   |
|------------------------------|-------|-----|-----|-----|-----|-----|---|---|---|---|---|---|---|---|---|---|---|---|---|---|---|---|---|---|---|---|---|---|---|---|---|---|---|---|---|---|---|---|---|---|---|---|---|---|---|---|
| AtSnRK2.4 At1g10940 (227)    | V     | H   | I   | S   | Q   | D   | C | K | N | L | I | S | R | I | F | V | A | N | S | L | K | R | I | T | I | A | E | T | K | - | K | H | S | W | F | L | K | N | L | P | R | E | L | T | E | T |
| AtSnRK2.9 AT2G23030 (227)    | V     | H   | I   | S   | E   | D   | C | R | K | L | L | S | R | I | F | V | A | N | L | H | R | S | T | L | K | E | I | K | - | S | H | A | W | F | L | K | N | L | P | R | E | L | K | E | P |   |
| HsSnRK NP_001094064 (237)    | -     | H   | V   | S   | K   | C   | K | D | L | I | T | R | M | L | Q | R | D | P | K | R | R | A | S | L | E | E | I | E | - | N | H | P | W | L | Q | G | V | D | P | S | P | A | T | K | Y |   |
| MmSnRK NP_001158044.1 (237)  | -     | R   | V   | S   | A   | G   | C | R | D | L | I | T | R | M | L | Q | R | D | P | K | R | R | A | S | L | E | E | I | - | S | H | P | W | L | Q | G | V | D | P | S | P | A | T | K | Y |   |
| OsSnRK 1a Os05g0530500 (232) | -     | H   | L   | S   | P   | L   | A | R | D | L | I | P | R | M | L | V | V | D | P |   |   |   |   |   |   |   |   |   |   |   |   |   |   |   |   |   |   |   |   |   |   |   |   |   |   |   |





|                              | (553) | 553        | 560     | 570               | 580          | 598               |
|------------------------------|-------|------------|---------|-------------------|--------------|-------------------|
| AtSnRK2.4 At1g10940 (364)    | ----- |            |         |                   |              |                   |
| AtSnRK2.9 AT2G23030 (340)    | ----- |            |         |                   |              |                   |
| HsSnRK NP_001094064 (411)    | AKK   | DLPELAGPA  | STV     | PPASLKPTASGRKCLFR | VEEDEEE      | DEEDK             |
| MmSnRK NP_001158044.1 (411)  | AKK   | ELPELAGPA  | STV     | PPASMKPAASGRKCLFR | VEEDEEE      | DEEDK             |
| OsSnRK 1a Os05g0530500 (393) | AHPRE | IITEVLKAL  | QEL     | NVCWKKIGHY        | NMKCRWSPSPSH | ESMMHN            |
| OsSnRK1b Os08g0484600 (398)  | AQPRE | IMTEVLKALE | ED      | NVCWKKNGQ         | NMKCRWS      | VGYPQATDMLDV      |
| ZmSnRK NP_001105673.1 (398)  | AHPRE | IMVEVLKAL  | QEL     | NVRWKKNGHY        | NVKCRWCPGFP  | EVNDTLDA          |
| TaCIPK20 (463)               | LSAEV | IQVTPAHC   | VVEVSK  | SSGDLRAYKEVC      | QYGNMNA      | WCSFQSDL          |
| TaCIPK17 (399)               | VCAEV | FVVLGPSLH  | VVELRK  | SQGD              | TAVYKKLCDR-  | ISSDLGIDN--I      |
| TaCIPK21 (389)               | LSAEV | FEINESLY   | VVELKR  | SCGDCSL           | YRQLCAT-     | LSDDLGICKSQQ      |
| AtSOS2 AAF62923.1 (387)      | VVIEI | YEVAPSLF   | MVDVR   | KAAGET            | LEYHKFY      | KK-LCSKLENI       |
| TaCIPK24 (387)               | VVLEI | FEVAPALF   | MVDVR   | KVAGDS            | LEYHRYKS-    | LCSKLESTIWRP      |
| TaCIPK8 (390)                | IMLQI | FEVAPSI    | FVVELER | SAGDT             | SEYKNFV      | NN-YCSKLEDDI      |
| TaCIPK23 (401)               | LATEV | FEVTPSLY   | VVELRK  | NSGDT             | LEFHKFY      | HS-LSNGLKDV       |
| TaCIPK3 (393)                | VATEV | FQVAPSLF   | VVELKK  | AKGDT             | LEFQKFY      | KT-LSAQTKD        |
| TaCIPK31 (394)               | VATEV | FQVAPSLH   | VVELKK  | AKGDT             | LEFQMFY      | RS-LSTQTKD        |
| TaCIPK32 (387)               | VATEI | LRVGPLSH   | MVEVR   | KAAGDT            | LEFHKFY      | KN-LSNLTKD        |
| TaCIPK9 (392)                | VATEV | FEVAPTLH   | VVELRK  | TGDDT             | LEFHSFY      | KN-FSSELEK        |
| TaCIPK22 (392)               | AMVRV | SRLLEEM    | LMVEVER | AS--S             | SDAPNL       | LWERLQQGLKFSND--- |
| TaCIPK29 (395)               | AKVTV | FRADTVS    | VVEVVK  | GH--G             | PEAAA        | FNDWLEPA          |
| TaCIPK4 (378)                | ISV   | ISELELPL   | LLVEMR  | LEM-DD            | GEVRF        | SWDQLRVE          |
| TaCIPK7 (380)                | MSMEM | SEVAPPL    | MLVELR  | LEAGD             | DEEVQAF      | GWDELRT           |
| TaCIPK12 (379)               | IGAEI | FELTPSL    | LVLEVKK | KAGDKAE           | YDDF         | CNKELKPG          |
| TaCIPK19 (462)               | ICAEI | FELTPSL    | VVEVKK  | KAGDKE            | EYDD         | CNKELKPG          |
| TaCIPK25 (430)               | ISTK  | IFQLTPEL   | VVMVQ   | VCKKAGD           | TAEYRQ       | FCGSELEK          |
| TaCIPK13 (463)               | MAATE | IYELTPEL   | VVVEVRR | KSGGAA            | EYEE         | FRARLKP           |
| TaCIPK10 (389)               | IDTEI | FRJAPNF    | HLEIR   | KTNGD             | TEYQK        | VK-HDMRPA         |
| TaCIPK2 (394)                | IDAEI | FEVTPDF    | HLELKK  | TNGDT             | IYEQK        | VLNQEMRPA         |
| TaCIPK11 (391)               | LDAEI | FDVAPS     | FLLVELK | KTNGD             | TFEYQ        | KLVKEEVRPA        |
| TaCIPK26 (390)               | FDAEV | FEFAPSL    | HLELKK  | TNGDT             | IYEQK        | LMKDEIRPA         |
| TaCIPK28 (377)               | FEAEI | FELASS     | FLLVELK | KTNGD             | IYEQK        | LLKEDIRPS         |
| TaCIPK14 (400)               | LDMEI | FEIITPS    | HHLEEM  | QTSGD             | PLEYREL      | LED-IRPAL         |
| TaCIPK15 (390)               | FDSI  | FEIITPS    | YHLEEM  | QTSGD             | SLEYQ        | KLLEESIRPA        |
| TaCIPK5 (392)                | IDAEI | FEVTPSF    | YVVEV   | VKSA              | GDTLEYER     | FCKMGLRPS         |
| TaCIPK27 (386)               | VAAE  | FFSVAPS    | VLVVDV  | VKDG              | GDTMEY       | RSFCSDEL          |
| TaCIPK6 (386)                | VAAE  | FFSVAPS    | VLVVDV  | VKDG              | GDTMEY       | RSFCSDEL          |
| TaCIPK30 (412)               | LEAEI | FEVAPSV    | HVVEMR  | KTGDS             | LEFHD        | FYKQELKPS         |
| TaCIPK16 (332)               | VTAEV | FEVAAD     | VTVE    | FAHDG             | GDALD        | ANKFCAED          |
| Consensus (553)              | V     | EIFEV      | PSL     | LVELKK            | GDT          | EY F L DIVW       |

|                              | (599) | 599       | 610    | 620      | 630    | 644          |
|------------------------------|-------|-----------|--------|----------|--------|--------------|
| AtSnRK2.4 At1g10940 (364)    | ----- |           |        |          |        |              |
| AtSnRK2.9 AT2G23030 (340)    | ----- |           |        |          |        |              |
| HsSnRK NP_001094064 (457)    | KPMSL | STQVVLRR  | KPSVTN | NRLTSRKS | APVLNQ | IFEEGESD     |
| MmSnRK NP_001158044.1 (457)  | KPVS  | LSTQVVLRR | KPSVTN | NRLTSRKS | APVLNQ | IFEEGESD     |
| OsSnRK 1a Os05g0530500 (439) | NHGF  | GAEASAI   | IETD   | SE----   | KSTHT  | VKFEIQLYKTR  |
| OsSnRK1b Os08g0484600 (444)  | NHSF  | VDDSI     | IMDNG  | DVNG---- | RLPA   | VIKFEIQLYKSR |
| ZmSnRK NP_001105673.1 (444)  | SNSF  | FLGDST    | IMDND  | DANG---- | RLPT   | VIKFEFQLYKTR |
| TaCIPK20 (509)               | ISRK  | HDAQFT    | DEQC   | NCIVNT   | CSSAQ  | ACPD         |
| TaCIPK17 (442)               | FGM   | GSLFDEN   | LPN    | FDSRA    | ATPL   | VAL          |
| TaCIPK21 (434)               | LLKN  | DSIRQ     | ELYR   | FNS      | SS     |              |
| AtSOS2 AAF62923.1 (432)      | TEGI  | PKSEI     | LR     | TIT      | F      |              |
| TaCIPK24 (432)               | IEV   | SAKS      | ALLR   | TTT      | C      |              |
| TaCIPK8 (435)                | SAE   | KGSR      | TSR    | LSKR     |        |              |
| TaCIPK23 (446)               | EGS   | IAEG      | DETR   | HR       | RS     |              |
| TaCIPK3 (438)                | ESE   | AEER      | G      | ST       |        |              |
| TaCIPK31 (439)               | GGE   | VED       | N      | ST       | V      |              |
| TaCIPK32 (432)               | DDL   | QIQ       | PS     |          |        |              |
| TaCIPK9 (437)                | ESN   | TI        | AK     |          |        |              |
| TaCIPK22 (433)               | ----- |           |        |          |        |              |
| TaCIPK29 (437)               | ----- |           |        |          |        |              |
| TaCIPK4 (423)                | WDS   | REDL      | Q      | Q        | V      |              |
| TaCIPK7 (425)                | WHG   | CEEL      |        |          |        |              |
| TaCIPK12 (425)               | QGS   | ARN       | V      | PS       | D      | T            |
| TaCIPK19 (508)               | VP    | -VP       | N      | T        | P      | T            |
| TaCIPK25 (476)               | PED   | GL        | P      | P        | T      | L            |
| TaCIPK13 (509)               | PAP   | R         | V      | G        | S      | K            |
| TaCIPK10 (434)               | QGE   | Q         | P      |          |        |              |
| TaCIPK2 (440)                | QGE   | Q         | Q      | P        | P      | P            |
| TaCIPK11 (437)               | QGD   | Q         | Q      | R        | S      | E            |
| TaCIPK26 (436)               | QGE   | S         | H      | L        | P      | E            |
| TaCIPK28 (423)               | HGD   | V         | Q      | Q        | A      | A            |
| TaCIPK14 (445)               | HGD   | D         | H      | H        | Q      | L            |
| TaCIPK15 (436)               | AWG   |           |        |          |        |              |
| TaCIPK5 (438)                | PSE   | E         | K      | L        | P      | S            |
| TaCIPK27 (432)               | AAAA  | AAAA      | AS     | PG       | D      | P            |
| TaCIPK6 (432)                | AAAA  | AAAA      | AS     | PG       | D      | P            |
| TaCIPK30 (458)               | QGD   | S         | P      | P        | P      | T            |
| TaCIPK16 (378)               | QGD   | V         | P      | A        | L      | P            |
| Consensus (599)              | S     | Q         | P      | P        | P      | P            |

|                              | (645) | 645           | 650           | 660          | 670      | 680   | 690   |
|------------------------------|-------|---------------|---------------|--------------|----------|-------|-------|
| AtSnRK2.4 At1g10940 (364)    |       | -----         | -----         | -----        | -----    | ----- | ----- |
| AtSnRK2.9 AT2G23030 (340)    |       | -----         | -----         | -----        | -----    | ----- | ----- |
| HsSnRK NP_001094064 (503)    |       | ENLPPKLSRLKMN | IASPGTVHKRYHR | RKSQGRGSSCSS | SETSDDDS |       |       |
| MmSnRK NP_001158044.1 (503)  |       | ENLPPKLSRLKMN | IASPGTVHKRYHR | RKSQGRGSSCSS | SETSDDDS |       |       |
| OsSnRK 1a Os05g0530500 (479) |       | LQRVSGPQLLFL  | DLCFAFLTQLRV  | L            |          |       |       |
| OsSnRk1b Os08g0484600 (485)  |       | MQRVTGPGQLL   | FLDFCAAFLTK   | LRVL         |          |       |       |
| ZmSnRK NP_001105673.1 (485)  |       | MQRVTGPGQLL   | FLDFCAAFLTK   | LRVL         |          |       |       |
| TaCIPK20 (539)               |       | -----         | -----         | -----        | -----    | ----- | ----- |
| TaCIPK17 (467)               |       | -----         | -----         | -----        | -----    | ----- | ----- |
| TaCIPK21 (452)               |       | -----         | -----         | -----        | -----    | ----- | ----- |
| AtSOS2 AAF62923.1 (447)      |       | -----         | -----         | -----        | -----    | ----- | ----- |
| TaCIPK24 (447)               |       | -----         | -----         | -----        | -----    | ----- | ----- |
| TaCIPK8 (450)                |       | -----         | -----         | -----        | -----    | ----- | ----- |
| TaCIPK23 (462)               |       | -----         | -----         | -----        | -----    | ----- | ----- |
| TaCIPK3 (448)                |       | -----         | -----         | -----        | -----    | ----- | ----- |
| TaCIPK31 (450)               |       | -----         | -----         | -----        | -----    | ----- | ----- |
| TaCIPK32 (440)               |       | -----         | -----         | -----        | -----    | ----- | ----- |
| TaCIPK9 (444)                |       | -----         | -----         | -----        | -----    | ----- | ----- |
| TaCIPK22 (433)               |       | -----         | -----         | -----        | -----    | ----- | ----- |
| TaCIPK29 (437)               |       | -----         | -----         | -----        | -----    | ----- | ----- |
| TaCIPK4 (433)                |       | -----         | -----         | -----        | -----    | ----- | ----- |
| TaCIPK7 (432)                |       | -----         | -----         | -----        | -----    | ----- | ----- |
| TaCIPK12 (437)               |       | -----         | -----         | -----        | -----    | ----- | ----- |
| TaCIPK19 (526)               |       | -----         | -----         | -----        | -----    | ----- | ----- |
| TaCIPK25 (488)               |       | -----         | -----         | -----        | -----    | ----- | ----- |
| TaCIPK13 (523)               |       | -----         | -----         | -----        | -----    | ----- | ----- |
| TaCIPK10 (439)               |       | -----         | -----         | -----        | -----    | ----- | ----- |
| TaCIPK2 (457)                |       | -----         | -----         | -----        | -----    | ----- | ----- |
| TaCIPK11 (483)               |       | LQPQEQQNLQE   | QPPLPPQNGFK   | HQD          |          |       |       |
| TaCIPK26 (482)               |       | QQPQE         |               |              |          |       |       |
| TaCIPK28 (468)               |       | APPPQ         |               |              |          |       |       |
| TaCIPK14 (455)               |       | -----         | -----         | -----        | -----    | ----- | ----- |
| TaCIPK15 (439)               |       | -----         | -----         | -----        | -----    | ----- | ----- |
| TaCIPK5 (465)                |       | -----         | -----         | -----        | -----    | ----- | ----- |
| TaCIPK27 (448)               |       | -----         | -----         | -----        | -----    | ----- | ----- |
| TaCIPK6 (448)                |       | -----         | -----         | -----        | -----    | ----- | ----- |
| TaCIPK30 (479)               |       | -----         | -----         | -----        | -----    | ----- | ----- |
| TaCIPK16 (390)               |       | -----         | -----         | -----        | -----    | ----- | ----- |
| Consensus (645)              |       | -----         | -----         | -----        | -----    | ----- | ----- |

|                              | (691) | 691       | 700       | 710        | 720        | 736          |
|------------------------------|-------|-----------|-----------|------------|------------|--------------|
| AtSnRK2.4 At1g10940 (364)    |       | -----     | -----     | -----      | -----      | -----        |
| AtSnRK2.9 AT2G23030 (340)    |       | -----     | -----     | -----      | -----      | -----        |
| HsSnRK NP_001094064 (549)    |       | ESRRRLDKD | SGFTYSWHR | RRDSSEGGPP | PGSEGDDGGG | QSKPSNASGGVD |
| MmSnRK NP_001158044.1 (549)  |       | ESRRRLDKD | SGFAYSWHR | RRDSSEGGPP | PGSEGDDGGG | QSKPS-SGGGVD |
| OsSnRK 1a Os05g0530500 (504) |       | -----     | -----     | -----      | -----      | -----        |
| OsSnRk1b Os08g0484600 (510)  |       | -----     | -----     | -----      | -----      | -----        |
| ZmSnRK NP_001105673.1 (510)  |       | -----     | -----     | -----      | -----      | -----        |
| TaCIPK20 (539)               |       | -----     | -----     | -----      | -----      | -----        |
| TaCIPK17 (467)               |       | -----     | -----     | -----      | -----      | -----        |
| TaCIPK21 (452)               |       | -----     | -----     | -----      | -----      | -----        |
| AtSOS2 AAF62923.1 (447)      |       | -----     | -----     | -----      | -----      | -----        |
| TaCIPK24 (447)               |       | -----     | -----     | -----      | -----      | -----        |
| TaCIPK8 (450)                |       | -----     | -----     | -----      | -----      | -----        |
| TaCIPK23 (462)               |       | -----     | -----     | -----      | -----      | -----        |
| TaCIPK3 (448)                |       | -----     | -----     | -----      | -----      | -----        |
| TaCIPK31 (450)               |       | -----     | -----     | -----      | -----      | -----        |
| TaCIPK32 (440)               |       | -----     | -----     | -----      | -----      | -----        |
| TaCIPK9 (444)                |       | -----     | -----     | -----      | -----      | -----        |
| TaCIPK22 (433)               |       | -----     | -----     | -----      | -----      | -----        |
| TaCIPK29 (437)               |       | -----     | -----     | -----      | -----      | -----        |
| TaCIPK4 (433)                |       | -----     | -----     | -----      | -----      | -----        |
| TaCIPK7 (432)                |       | -----     | -----     | -----      | -----      | -----        |
| TaCIPK12 (437)               |       | -----     | -----     | -----      | -----      | -----        |
| TaCIPK19 (526)               |       | -----     | -----     | -----      | -----      | -----        |
| TaCIPK25 (488)               |       | -----     | -----     | -----      | -----      | -----        |
| TaCIPK13 (523)               |       | -----     | -----     | -----      | -----      | -----        |
| TaCIPK10 (439)               |       | -----     | -----     | -----      | -----      | -----        |
| TaCIPK2 (457)                |       | -----     | -----     | -----      | -----      | -----        |
| TaCIPK11 (508)               |       | -----     | -----     | -----      | -----      | -----        |
| TaCIPK26 (487)               |       | -----     | -----     | -----      | -----      | -----        |
| TaCIPK28 (473)               |       | -----     | -----     | -----      | -----      | -----        |
| TaCIPK14 (455)               |       | -----     | -----     | -----      | -----      | -----        |
| TaCIPK15 (439)               |       | -----     | -----     | -----      | -----      | -----        |
| TaCIPK5 (465)                |       | -----     | -----     | -----      | -----      | -----        |
| TaCIPK27 (448)               |       | -----     | -----     | -----      | -----      | -----        |
| TaCIPK6 (448)                |       | -----     | -----     | -----      | -----      | -----        |
| TaCIPK30 (479)               |       | -----     | -----     | -----      | -----      | -----        |
| TaCIPK16 (390)               |       | -----     | -----     | -----      | -----      | -----        |
| Consensus (691)              |       | -----     | -----     | -----      | -----      | -----        |



|                              | (737)                                           | 737 | 750 | 760 | 770 | 782 |
|------------------------------|-------------------------------------------------|-----|-----|-----|-----|-----|
| AtSnRK2.4 At1g10940 (364)    | -----                                           |     |     |     |     |     |
| AtSnRK2.9 AT2G23030 (340)    | -----                                           |     |     |     |     |     |
| HsSnRK NP_001094064 (595)    | KASPSENNAGGGSPSSGSGGNPTNTSGTTRRCAGPSNS-----MQL  |     |     |     |     |     |
| MmSnRK NP_001158044.1 (594)  | KASPGEQGTGGGS-QGGSGGTPSGTAGSSRRRCAGPDSSSPSPASAS |     |     |     |     |     |
| OsSnRK 1a Os05g0530500 (504) | -----                                           |     |     |     |     |     |
| OsSnRk1b Os08g0484600 (510)  | -----                                           |     |     |     |     |     |
| ZmSnRK NP_001105673.1 (510)  | -----                                           |     |     |     |     |     |
| TaCIPK20 (539)               | -----                                           |     |     |     |     |     |
| TaCIPK17 (467)               | -----                                           |     |     |     |     |     |
| TaCIPK21 (452)               | -----                                           |     |     |     |     |     |
| AtSOS2 AAF62923.1 (447)      | -----                                           |     |     |     |     |     |
| TaCIPK24 (447)               | -----                                           |     |     |     |     |     |
| TaCIPK8 (450)                | -----                                           |     |     |     |     |     |
| TaCIPK23 (462)               | -----                                           |     |     |     |     |     |
| TaCIPK3 (448)                | -----                                           |     |     |     |     |     |
| TaCIPK31 (450)               | -----                                           |     |     |     |     |     |
| TaCIPK32 (440)               | -----                                           |     |     |     |     |     |
| TaCIPK9 (444)                | -----                                           |     |     |     |     |     |
| TaCIPK22 (433)               | -----                                           |     |     |     |     |     |
| TaCIPK29 (437)               | -----                                           |     |     |     |     |     |
| TaCIPK4 (433)                | -----                                           |     |     |     |     |     |
| TaCIPK7 (432)                | -----                                           |     |     |     |     |     |
| TaCIPK12 (437)               | -----                                           |     |     |     |     |     |
| TaCIPK19 (526)               | -----                                           |     |     |     |     |     |
| TaCIPK25 (488)               | -----                                           |     |     |     |     |     |
| TaCIPK13 (523)               | -----                                           |     |     |     |     |     |
| TaCIPK10 (439)               | -----                                           |     |     |     |     |     |
| TaCIPK2 (457)                | -----                                           |     |     |     |     |     |
| TaCIPK11 (508)               | -----                                           |     |     |     |     |     |
| TaCIPK26 (487)               | -----                                           |     |     |     |     |     |
| TaCIPK28 (473)               | -----                                           |     |     |     |     |     |
| TaCIPK14 (455)               | -----                                           |     |     |     |     |     |
| TaCIPK15 (439)               | -----                                           |     |     |     |     |     |
| TaCIPK5 (465)                | -----                                           |     |     |     |     |     |
| TaCIPK27 (448)               | -----                                           |     |     |     |     |     |
| TaCIPK6 (448)                | -----                                           |     |     |     |     |     |
| TaCIPK30 (479)               | -----                                           |     |     |     |     |     |
| TaCIPK16 (390)               | -----                                           |     |     |     |     |     |
| Consensus (737)              | -----                                           |     |     |     |     |     |

|                              | (783)                                           | 783 | 790 | 800 | 810 | 828 |
|------------------------------|-------------------------------------------------|-----|-----|-----|-----|-----|
| AtSnRK2.4 At1g10940 (364)    | -----                                           |     |     |     |     |     |
| AtSnRK2.9 AT2G23030 (340)    | -----                                           |     |     |     |     |     |
| HsSnRK NP_001094064 (636)    | ASRSAGELVESLKLMSLCLGSQLHGSTKYIIDPQNGLSFSSVKVQE  |     |     |     |     |     |
| MmSnRK NP_001158044.1 (639)  | AAPRGAELVQSLKLVSLCLGSQLHG- AKYILDPQK-ALFSSVKVQE |     |     |     |     |     |
| OsSnRK 1a Os05g0530500 (504) | -----                                           |     |     |     |     |     |
| OsSnRk1b Os08g0484600 (510)  | -----                                           |     |     |     |     |     |
| ZmSnRK NP_001105673.1 (510)  | -----                                           |     |     |     |     |     |
| TaCIPK20 (539)               | -----                                           |     |     |     |     |     |
| TaCIPK17 (467)               | -----                                           |     |     |     |     |     |
| TaCIPK21 (452)               | -----                                           |     |     |     |     |     |
| AtSOS2 AAF62923.1 (447)      | -----                                           |     |     |     |     |     |
| TaCIPK24 (447)               | -----                                           |     |     |     |     |     |
| TaCIPK8 (450)                | -----                                           |     |     |     |     |     |
| TaCIPK23 (462)               | -----                                           |     |     |     |     |     |
| TaCIPK3 (448)                | -----                                           |     |     |     |     |     |
| TaCIPK31 (450)               | -----                                           |     |     |     |     |     |
| TaCIPK32 (440)               | -----                                           |     |     |     |     |     |
| TaCIPK9 (444)                | -----                                           |     |     |     |     |     |
| TaCIPK22 (433)               | -----                                           |     |     |     |     |     |
| TaCIPK29 (437)               | -----                                           |     |     |     |     |     |
| TaCIPK4 (433)                | -----                                           |     |     |     |     |     |
| TaCIPK7 (432)                | -----                                           |     |     |     |     |     |
| TaCIPK12 (437)               | -----                                           |     |     |     |     |     |
| TaCIPK19 (526)               | -----                                           |     |     |     |     |     |
| TaCIPK25 (488)               | -----                                           |     |     |     |     |     |
| TaCIPK13 (523)               | -----                                           |     |     |     |     |     |
| TaCIPK10 (439)               | -----                                           |     |     |     |     |     |
| TaCIPK2 (457)                | -----                                           |     |     |     |     |     |
| TaCIPK11 (508)               | -----                                           |     |     |     |     |     |
| TaCIPK26 (487)               | -----                                           |     |     |     |     |     |
| TaCIPK28 (473)               | -----                                           |     |     |     |     |     |
| TaCIPK14 (455)               | -----                                           |     |     |     |     |     |
| TaCIPK15 (439)               | -----                                           |     |     |     |     |     |
| TaCIPK5 (465)                | -----                                           |     |     |     |     |     |
| TaCIPK27 (448)               | -----                                           |     |     |     |     |     |
| TaCIPK6 (448)                | -----                                           |     |     |     |     |     |
| TaCIPK30 (479)               | -----                                           |     |     |     |     |     |
| TaCIPK16 (390)               | -----                                           |     |     |     |     |     |
| Consensus (783)              | -----                                           |     |     |     |     |     |

|                              | (829) | 829                                            | 840   | 850   | 860   | 874   |
|------------------------------|-------|------------------------------------------------|-------|-------|-------|-------|
| AtSnRK2.4 At1g10940 (364)    |       | -----                                          | ----- | ----- | ----- | ----- |
| AtSnRK2.9 AT2G23030 (340)    |       | -----                                          | ----- | ----- | ----- | ----- |
| HsSnRK NP_001094064 (682)    |       | KSTWKMCISSTGNAGQVPAVGGIKFFSDHMADTTTELERIKSKNLK |       |       |       |       |
| MmSnRK NP_001158044.1 (683)  |       | KSTWKMCISAPG-----PS-----P-SADLDPVVRTKKLR       |       |       |       |       |
| OsSnRK 1a Os05g0530500 (504) |       | -----                                          | ----- | ----- | ----- | ----- |
| OsSnRk1b Os08g0484600 (510)  |       | -----                                          | ----- | ----- | ----- | ----- |
| ZmSnRK NP_001105673.1 (510)  |       | -----                                          | ----- | ----- | ----- | ----- |
| TaCIPK20 (539)               |       | -----                                          | ----- | ----- | ----- | ----- |
| TaCIPK17 (467)               |       | -----                                          | ----- | ----- | ----- | ----- |
| TaCIPK21 (452)               |       | -----                                          | ----- | ----- | ----- | ----- |
| AtSOS2 AAF62923.1 (447)      |       | -----                                          | ----- | ----- | ----- | ----- |
| TaCIPK24 (447)               |       | -----                                          | ----- | ----- | ----- | ----- |
| TaCIPK8 (450)                |       | -----                                          | ----- | ----- | ----- | ----- |
| TaCIPK23 (462)               |       | -----                                          | ----- | ----- | ----- | ----- |
| TaCIPK3 (448)                |       | -----                                          | ----- | ----- | ----- | ----- |
| TaCIPK31 (450)               |       | -----                                          | ----- | ----- | ----- | ----- |
| TaCIPK32 (440)               |       | -----                                          | ----- | ----- | ----- | ----- |
| TaCIPK9 (444)                |       | -----                                          | ----- | ----- | ----- | ----- |
| TaCIPK22 (433)               |       | -----                                          | ----- | ----- | ----- | ----- |
| TaCIPK29 (437)               |       | -----                                          | ----- | ----- | ----- | ----- |
| TaCIPK4 (433)                |       | -----                                          | ----- | ----- | ----- | ----- |
| TaCIPK7 (432)                |       | -----                                          | ----- | ----- | ----- | ----- |
| TaCIPK12 (437)               |       | -----                                          | ----- | ----- | ----- | ----- |
| TaCIPK19 (526)               |       | -----                                          | ----- | ----- | ----- | ----- |
| TaCIPK25 (488)               |       | -----                                          | ----- | ----- | ----- | ----- |
| TaCIPK13 (523)               |       | -----                                          | ----- | ----- | ----- | ----- |
| TaCIPK10 (439)               |       | -----                                          | ----- | ----- | ----- | ----- |
| TaCIPK2 (457)                |       | -----                                          | ----- | ----- | ----- | ----- |
| TaCIPK11 (508)               |       | -----                                          | ----- | ----- | ----- | ----- |
| TaCIPK26 (487)               |       | -----                                          | ----- | ----- | ----- | ----- |
| TaCIPK28 (473)               |       | -----                                          | ----- | ----- | ----- | ----- |
| TaCIPK14 (455)               |       | -----                                          | ----- | ----- | ----- | ----- |
| TaCIPK15 (439)               |       | -----                                          | ----- | ----- | ----- | ----- |
| TaCIPK5 (465)                |       | -----                                          | ----- | ----- | ----- | ----- |
| TaCIPK27 (448)               |       | -----                                          | ----- | ----- | ----- | ----- |
| TaCIPK6 (448)                |       | -----                                          | ----- | ----- | ----- | ----- |
| TaCIPK30 (479)               |       | -----                                          | ----- | ----- | ----- | ----- |
| TaCIPK16 (390)               |       | -----                                          | ----- | ----- | ----- | ----- |
| Consensus (829)              |       | -----                                          | ----- | ----- | ----- | ----- |

|                              | (875) | 875                                    | 880   | 890   | 900   | 912   |
|------------------------------|-------|----------------------------------------|-------|-------|-------|-------|
| AtSnRK2.4 At1g10940 (364)    |       | -----                                  | ----- | ----- | ----- | ----- |
| AtSnRK2.9 AT2G23030 (340)    |       | -----                                  | ----- | ----- | ----- | ----- |
| HsSnRK NP_001094064 (728)    |       | NNVLQLPLCEKTISVNIQRNPKEGLLCASSPASCCHVI |       |       |       |       |
| MmSnRK NP_001158044.1 (711)  |       | NNALQLPLCEKTISVNIQRSRKEGLLCASSPASCCHVI |       |       |       |       |
| OsSnRK 1a Os05g0530500 (504) |       | -----                                  | ----- | ----- | ----- | ----- |
| OsSnRk1b Os08g0484600 (510)  |       | -----                                  | ----- | ----- | ----- | ----- |
| ZmSnRK NP_001105673.1 (510)  |       | -----                                  | ----- | ----- | ----- | ----- |
| TaCIPK20 (539)               |       | -----                                  | ----- | ----- | ----- | ----- |
| TaCIPK17 (467)               |       | -----                                  | ----- | ----- | ----- | ----- |
| TaCIPK21 (452)               |       | -----                                  | ----- | ----- | ----- | ----- |
| AtSOS2 AAF62923.1 (447)      |       | -----                                  | ----- | ----- | ----- | ----- |
| TaCIPK24 (447)               |       | -----                                  | ----- | ----- | ----- | ----- |
| TaCIPK8 (450)                |       | -----                                  | ----- | ----- | ----- | ----- |
| TaCIPK23 (462)               |       | -----                                  | ----- | ----- | ----- | ----- |
| TaCIPK3 (448)                |       | -----                                  | ----- | ----- | ----- | ----- |
| TaCIPK31 (450)               |       | -----                                  | ----- | ----- | ----- | ----- |
| TaCIPK32 (440)               |       | -----                                  | ----- | ----- | ----- | ----- |
| TaCIPK9 (444)                |       | -----                                  | ----- | ----- | ----- | ----- |
| TaCIPK22 (433)               |       | -----                                  | ----- | ----- | ----- | ----- |
| TaCIPK29 (437)               |       | -----                                  | ----- | ----- | ----- | ----- |
| TaCIPK4 (433)                |       | -----                                  | ----- | ----- | ----- | ----- |
| TaCIPK7 (432)                |       | -----                                  | ----- | ----- | ----- | ----- |
| TaCIPK12 (437)               |       | -----                                  | ----- | ----- | ----- | ----- |
| TaCIPK19 (526)               |       | -----                                  | ----- | ----- | ----- | ----- |
| TaCIPK25 (488)               |       | -----                                  | ----- | ----- | ----- | ----- |
| TaCIPK13 (523)               |       | -----                                  | ----- | ----- | ----- | ----- |
| TaCIPK10 (439)               |       | -----                                  | ----- | ----- | ----- | ----- |
| TaCIPK2 (457)                |       | -----                                  | ----- | ----- | ----- | ----- |
| TaCIPK11 (508)               |       | -----                                  | ----- | ----- | ----- | ----- |
| TaCIPK26 (487)               |       | -----                                  | ----- | ----- | ----- | ----- |
| TaCIPK28 (473)               |       | -----                                  | ----- | ----- | ----- | ----- |
| TaCIPK14 (455)               |       | -----                                  | ----- | ----- | ----- | ----- |
| TaCIPK15 (439)               |       | -----                                  | ----- | ----- | ----- | ----- |
| TaCIPK5 (465)                |       | -----                                  | ----- | ----- | ----- | ----- |
| TaCIPK27 (448)               |       | -----                                  | ----- | ----- | ----- | ----- |
| TaCIPK6 (448)                |       | -----                                  | ----- | ----- | ----- | ----- |
| TaCIPK30 (479)               |       | -----                                  | ----- | ----- | ----- | ----- |
| TaCIPK16 (390)               |       | -----                                  | ----- | ----- | ----- | ----- |
| Consensus (875)              |       | -----                                  | ----- | ----- | ----- | ----- |

**Additional file 6:** Analysis of SnRK proteins of representative species. Multiple sequence alignment was performed using the ClustalX1.83. Identical amino acids are shaded in yellow, conservative amino acids are shaded in wathet blue and similar amino acids are shaded in green. The PKC domain and NAD/FISL motifs are indicated in the figure.
