# Supplementary material for: Identification and comprehensive analyses of the CBL and CIPK gene families in wheat (Triticum aestivum L.)
Source: PubMed Central journal article supplement (PMC4634908; doi:10.1186/s12870-015-0657-4), 2015-11-04
Supplement: 12870_2015_657_MOESM7_ESM.pdf [file 12870_2015_657_MOESM7_ESM.pdf]

**Additional files 7.** The interaction analysis of wheat TaCBL and TaCIPK proteins were performed by Y2H method. TaCIPKs and TaCBLs were respectively cloned to PGAD and PGBK vectors, and then co-transformed into Y187 strains. The transformants containing the target plasmid combinations were grown on either the double dropout medium (DDO: SD/-Trp/-Leu) or triple dropout medium (TDO: SD/-Trp/-Leu/-His/+10mM 3AT)
